# Supplementary material for: Hollow cobalt phosphide octahedral pre-catalysts with exceptionally high intrinsic catalytic activity for electro-oxidation of water and methanol
Source: Royal Society of Chemistry journal article supplement (doi:10.1039/c8ta07958g), 2018-01-01
Supplement: c8ta07958g1.pdf [file c8ta07958g1.pdf]

# Hollow cobalt phosphide octahedral pre-catalysts with exceptionally high intrinsic catalytic activity for electro-oxidation of water and methanol

Junyuan Xu,<sup>a</sup> Yuefeng Liu,<sup>b</sup> Junjie Li,<sup>a</sup> Isilda Amorim,<sup>a</sup> Bingsen Zhang,<sup>c</sup> Dehua Xiong,<sup>d</sup> Nan Zhang,<sup>a</sup> Sitaramanjaneva Mouli Thalluri,<sup>a</sup> Juliana P. S. Sousa<sup>a</sup> and Lifeng Liu<sup>a\*</sup>

<sup>a</sup> *International Iberian Nanotechnology Laboratory (INL), Av. Mestre Jose Veiga, 4715-330 Braga, Portugal.*

<sup>b</sup> *Dalian National Laboratory for Clean Energy, Dalian Institute of Chemical Physics, Chinese Academy of Sciences, 116023, Dalian, China.*

<sup>c</sup> *Shenyang National Laboratory for Materials Science and Institute of Metal Research, Chinese Academy of Sciences, 110016, Shenyang, China.*

<sup>d</sup> *State Key Laboratory of Silicate Materials for Architectures, Wuhan University of Technology, 430070, Wuhan, China.*

## Experimental procedures

### Reagents

$(\text{CH}_3\text{COO})_2\text{Co} \cdot 4\text{H}_2\text{O}$ ,  $\text{NaH}_2\text{PO}_2 \cdot x\text{H}_2\text{O}$ , polyvinylpyrrolidone (MW = 40000), ethylene glycol, and oleylamine were purchased from Sigma-Aldrich, and  $\text{RuO}_2$  (anhydrous) was acquired from Alfa Aesar. All reagents were used as received without further purification.

### Synthesis of hollow CoP octahedrons (OCHs) and porous CoP nanospheres (NSs)

Initially, the CoO OCHs were prepared by a hydrothermal method. 200 mg of  $(\text{CH}_3\text{COO})_2\text{Co} \cdot 4\text{H}_2\text{O}$  was firstly dissolved in 40 mL of oleylamine. After continuously stirring for 3 h at room temperature, the solution was transferred to a 50 mL Teflon-lined stainless steel autoclave. The autoclave was then sealed and maintained at 180 °C for 24 h in an oven. After cooling down to room temperature, the solution was centrifuged at 7000 rpm and rinsed several times with ethanol-cyclohexane mixture (volume ratio, 1/4). The as-obtained CoO OCHs were dried in a vacuum oven at 60 °C for 6 h. The surface oxidation of CoO OCHs was performed in air at 300 °C, resulting in a  $\text{CoO@Co}_3\text{O}_4$  core/shell structure. Subsequently, phosphorization was carried out at the same temperature using  $\text{NaH}_2\text{PO}_2 \cdot x\text{H}_2\text{O}$  as the source of phosphorus and high-purity  $\text{N}_2$  (99.999 %) as carrier gas to obtain  $\text{CoO@CoP}$ . Typically, 0.1 g of  $\text{CoO@Co}_3\text{O}_4$  powders were loaded in a ceramic boat, with 1.0 g of  $\text{NaH}_2\text{PO}_2 \cdot x\text{H}_2\text{O}$  placed 2 cm away from the  $\text{CoO@Co}_3\text{O}_4$  powders at the upstream side. The boat was then put into a tube furnace, wherein high-purity  $\text{N}_2$  (99.999 %) was purged at a flow rate of 800 SCCM for 1 h to remove air. Afterwards, the furnace was ramped to 300 °C at a rate of 5 °C  $\text{min}^{-1}$ , held at this temperature for 4 h, and then cooled down naturally to room temperature. A constant  $\text{N}_2$  flow was maintained in the whole process. Finally, the hollow CoP OCHs were obtained by etching  $\text{CoO@CoP}$  (2.5 mg  $\text{mL}^{-1}$ ) in 0.5 M HCl for 30 min.

Porous CoP NSs were prepared by phosphorization of Co-glycorate NS precursors. The Co-glycorate NSs were synthesized as follows: 750 mg of  $(\text{CH}_3\text{COO})_2\text{Co} \cdot 4\text{H}_2\text{O}$ , 375 mg of polyvinylpyrrolidone and 60 mL of ethylene glycol were added into a 250 ml three-necked flask with rigorous magnetic stirring for 3 h at room temperature.<sup>[S1]</sup> Then the reaction temperature was increased to 190 °C in 10 minutes. After 1 h reaction, the solution was naturally cooled down to room temperature. The product was centrifuged, rinsed with ethanol several times to remove the residual polyvinylpyrrolidone, and then dried in a vacuum oven at 60 °C for 6 h. The phosphorization was carried out using the same procedure as mentioned above.

### **Material characterization**

Powder XRD experiments were conducted on a X'Pert PRO diffractometer (PANalytical) set at 45 kV and 40 mA, using Cu  $K_\alpha$  radiation ( $\lambda = 1.541874 \text{ \AA}$ ) and a PIXcel detector. Data were collected with the Bragg-Brentano configuration in the  $2\theta$  range of 10 – 90° at a scan speed of 0.01 °s<sup>-1</sup>. The crystallinity of the hollow CoP OCHs and porous CoP NSs was analyzed using Highscore software (PANalytical) with a standard reference of Cryst50. The crystallinity of Cryst50 was firstly calibrated to 50% by altering the parameter of Constant Background, and then the crystallinity of the hollow CoP OCHs and porous CoP NSs was obtained accordingly (**Fig. S12**). XPS characterization was carried out on an ESCALAB 250 instrument with Al  $K_\alpha$  X-rays (1489.6 eV). SEM examination was performed on a FEI Quanta 650 FEG microscope equipped with INCA 350 spectrometer (Oxford Instruments) for EDX. TEM, HRTEM and EDX elemental mapping studies were conducted on a probe-corrected transmission electron microscope operating at 200 kV (FEI Themis 60-300). TG-DSC analysis was done in air with a heating rate of 2 °C min<sup>-1</sup> (Mettler Toledo).

The morphology and composition of pre-catalysts after the OER and MOR stability tests were also examined by SEM, EDX and XPS, respectively. Before the examination, the carbon paper substrate loaded with the catalysts was immersed in deionized water for 2 h to get rid of the residual electrolyte, and then dried naturally in air.

### **Electrode preparation and electrocatalytic measurements**

The catalyst ink was prepared by ultrasonically dispersing 5 mg of catalysts into 1 mL of ethanol containing 50  $\mu\text{L}$  of Nafion solution (Sigma, 5 wt %). To prepare an electrode for catalytic tests, 100  $\mu\text{L}$  of catalyst ink was loaded on a CP substrate with an exposed area of 1  $\text{cm}^2$ , leading to a loading density of *ca.* 0.5  $\text{mg cm}^{-2}$ . The electrode was then dried at room temperature naturally in air. All electrocatalytic tests were carried out in a three-electrode configuration at room temperature using a Biologic VMP-3 potentiostat/galvanostat. The catalyst-loaded carbon paper, Pt wire (for OER) or graphite (for MOR), and a saturated calomel electrode (SCE) were utilized as working, counter and reference electrodes, respectively. The SCE reference was calibrated prior to each measurement in  $\text{H}_2$ -saturated 0.5 M  $\text{H}_2\text{SO}_4$  solution using a clean Pt wire as the working electrode.

**OER in 1.0 M KOH:** The potentials are reported versus RHE in OER by converting the measured potentials according to the following equation:

$$E_{\text{RHE}} = E_{\text{SCE}} + 0.059 \times \text{pH} + 0.244 \quad (\text{S1})$$

Cyclic voltammetry (CV) was performed at a scan rate of 5  $\text{mV s}^{-1}$  in the potential range of 1.0 to 1.7 V vs. RHE. An *iR*-correction (85 %) was made to compensate the voltage drop between the reference and working electrodes, which was measured by a single-point high-frequency impedance measurement. EIS measurements were carried out at 1.49 V vs. RHE in the frequency range of  $10^5$  to 0.01 Hz with a 10 mV sinusoidal perturbation. The double layer

capacitance ( $C_{dl}$ ) of the catalysts was estimated by performing CV at different scan rates ( $\nu$ ) of 10, 20, 30, 40, 50, 60, 70, 80, 90 and 100  $\text{mV s}^{-1}$ , followed by extracting the slope from the resulting  $|j_a - j_c|/2$  vs.  $\nu$  plots, where  $j_a$  and  $j_c$  represent the anodic and cathodic currents at a given potential, respectively. The electrochemically-accessible surface area (ECSA) can be calculated by dividing the measured  $C_{dl}$  by the capacitance of a model catalyst over a unit surface area (usually  $0.04 \text{ mF cm}_{\text{geo}}^{-2}$ , according to previous report<sup>[S2]</sup>):

$$ECSA = C_{dl} / 0.04 \text{ mF cm}^{-2} \quad (S2)$$

The  $\text{TOF}_{\text{mass}}$  values were calculated through the following equation:<sup>[S3]</sup>

$$\text{TOF (s}^{-1}\text{)} = (j \times A) / (4 \times F \times n) \quad (S3)$$

where  $j$  ( $\text{A cm}^{-2}$ ) is the current density at a given overpotential,  $A = 1.0 \text{ cm}^2$  is the geometric surface area of the working electrode,  $F = 96500 \text{ C mol}^{-1}$  stands for the Faraday constant,  $n$  (mol) is mole number of transition metal(s) loaded on the electrode. All metal cations were assumed to be catalytically active, so the calculated value represents the lower limits of TOF. For hollow CoP OCHs and porous CoP NSs, the Co content ( $P_{\text{Co}}$ , in wt %) in the pre-catalysts was determined by inductively-coupled plasma mass spectroscopy (ICP-MS, Agilent 7700X). Specifically, 20 mg of pre-catalysts were dispersed in 12 g of concentrated nitric acid in an autoclave, which was then kept in an electric oven at  $180 \text{ }^\circ\text{C}$  for 12 h. Subsequently, the acidic solution was diluted in a 50 mL volumetric flask. The analyses were done three times using *ca.* 10 mL solution each time to obtain an average value ( $P_{\text{Co}} = 62 \text{ wt \% Co}$  for hollow CoP OCH;  $P_{\text{Co}} = 61 \text{ wt \% Co}$  for porous CoP NSs). The  $n_{\text{Co}}$  was then obtained according to the following equation:

$$n_{\text{Co}} = \frac{0.0005 \text{ g cm}^{-2} \times 1.0 \text{ cm}^2 \times P_{\text{Co}}}{M_{\text{Co}}} \quad (S4)$$

where  $M_{\text{Co}} = 58.93 \text{ g mol}^{-1}$  is the molecular weight of Co.

the calculation  $\text{TOF}_{\text{mass}}$  of commercial  $\text{RuO}_2$  NPs is similar but  $n_{\text{Ru}}$  was obtained according to the following equation:

$$n_{\text{Ru}} = \frac{0.0005 \text{ g cm}^{-2} \times 1.0 \text{ cm}^2}{M_{\text{RuO}_2}} \quad (\text{S5})$$

where  $M_{\text{RuO}_2} = 133.07 \text{ g mol}^{-1}$  is the molecular weight of  $\text{RuO}_2$ .

The  $\text{TOF}_{\text{surface}}$  values were calculated based on the number of active sites for each catalyst using the same formula as shown in **Equation S3**, but  $n$  in this case represents the number of surface active sites, namely surface charge (in the unit of C), which can be quantified through CV measurements in neutral solution (all electrochemically-accessible surface sites including those that are catalytically inactive, are taken into account. Therefore, thus-calculated TOF value represents the lower limit of  $\text{TOF}_{\text{surface}}$ ). All CV measurements were conducted in the potential range of 0 – 0.6 V vs. RHE at a fixed scan rate of  $50 \text{ mV s}^{-1}$  in PBS solution (pH =7). The surface charge was then calculated as follows:<sup>[S4,S5]</sup>

$$Q_s = \frac{1}{2} \int_{E_0}^{E_1} \frac{j}{v} dE \quad (\text{S6})$$

where  $j$  is the current density,  $v$  is the scan rate, and  $E_0$  and  $E_1$  represent the lower and upper potential limits, respectively.

The catalytic stability of all catalysts was assessed at a constant current density of  $10 \text{ mA cm}^{-2}$  in  $1.0 \text{ M KOH}$  solution at room temperature.

**MOR in 1.0 M KOH + 1.0 M methanol:** *iR*-corrected (85 %) CV was recorded at a scan rate of  $5 \text{ mV s}^{-1}$  in the potential range of  $0 - 0.44 \text{ V vs. SCE}$ . EIS measurements were carried out at  $0.35 \text{ V vs. SCE}$  in the frequency range of  $10^5 - 0.01 \text{ Hz}$  with a  $10 \text{ mV}$  sinusoidal perturbation.

The stability was examined by continuous CV scans in the potential range of  $0 - 0.35 \text{ V vs. SCE}$  at  $100 \text{ mV s}^{-1}$ . After a given number of CV cycles, the *iR*-corrected (85 %) CV ( $0 - 0.44 \text{ V vs. SCE}$ ,  $5 \text{ mV s}^{-1}$ ) and EIS ( $0.35 \text{ V vs. SCE}$ ) were recorded, and the current density at  $0.44 \text{ V vs. SCE}$  and the  $R_{ct}$  value extracted from EIS were obtained and compared to the initial values.

Supporting figures and tables

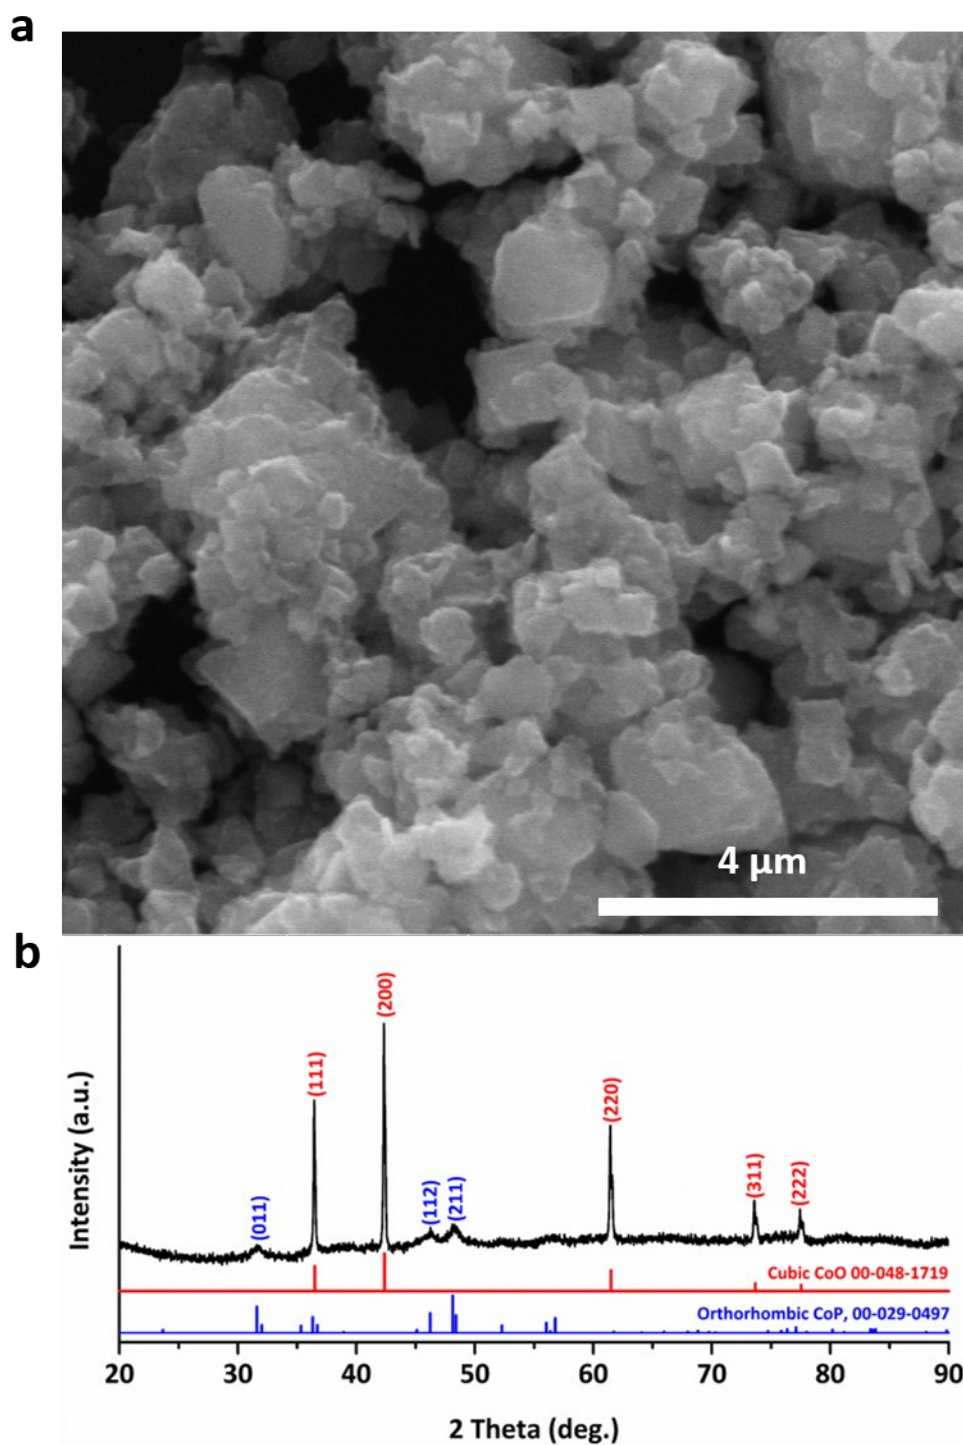

**Fig. S1.** (a) The morphology and (b) XRD pattern of CoO@CoP obtained by direct phosphorization of CoO OCHs at 300 °C in N<sub>2</sub> (99.999%) for 4 h.



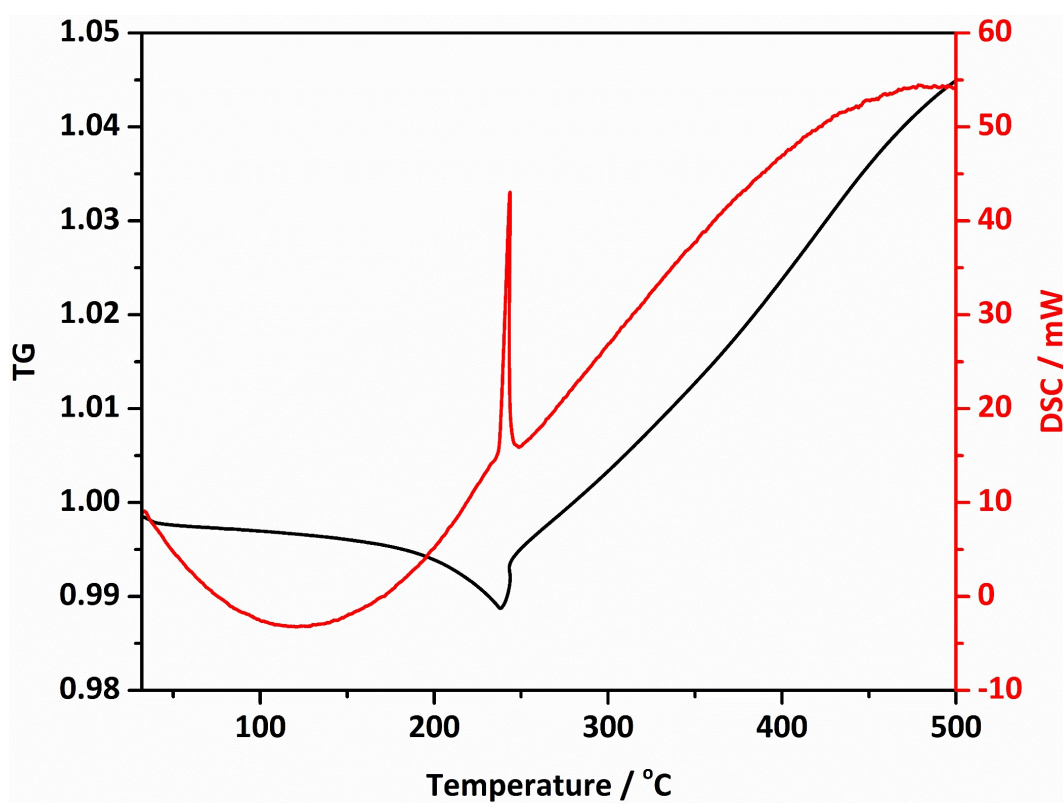

**Fig. S2.** TG-DSC curves of CoO OCHs recorded in air with a ramping rate of  $2\text{ }^{\circ}\text{C min}^{-1}$ .

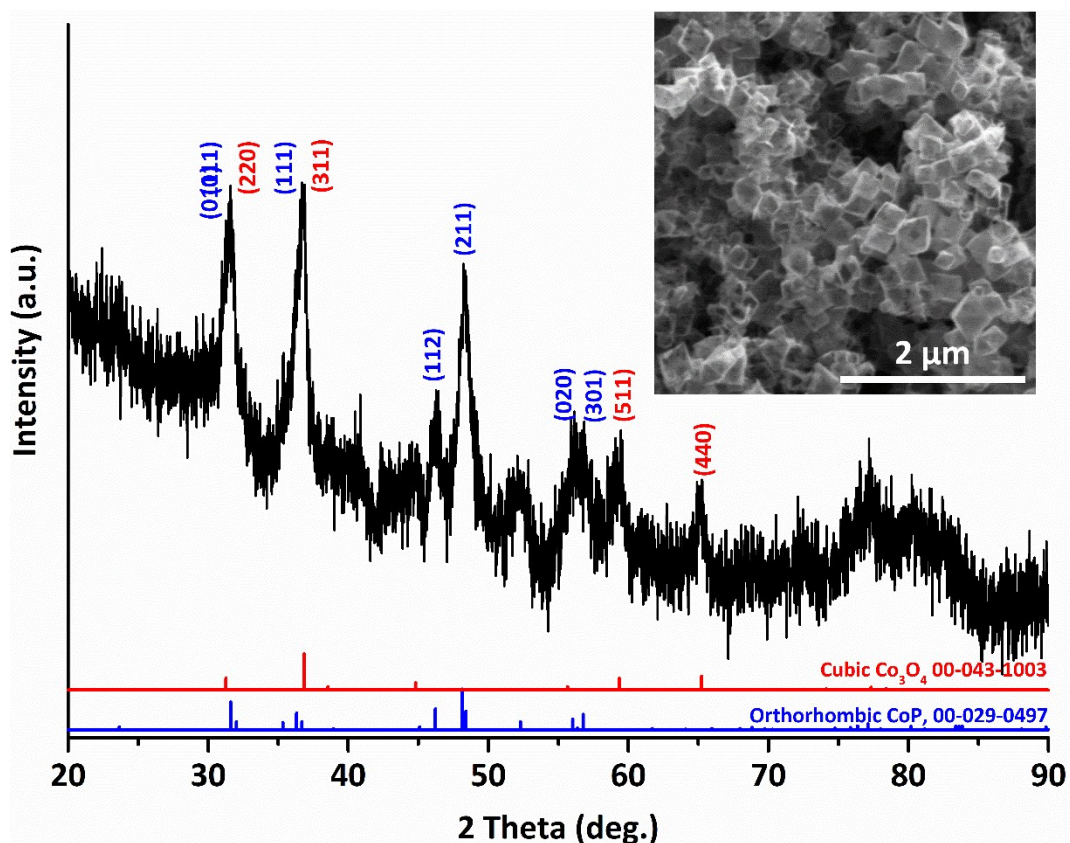

**Fig. S3.** XRD pattern of the CoP sample prepared by post annealing of CoO OCHs in air at 350 °C for 2 h, followed by the same phosphorization and chemical etching processes as those used for preparing hollow CoP OCHs. In addition to the diffractions from CoP, XRD peaks from Co<sub>3</sub>O<sub>4</sub> are also observed, indicating incomplete conversion of Co<sub>3</sub>O<sub>4</sub> to CoP. The standard powder diffraction patterns of cubic Co<sub>3</sub>O<sub>4</sub> (ICDD No.00-043-1003) and orthorhombic CoP (ICDD No. 00-029-0497) are given for reference. The inset shows the morphology of the sample, which also exhibits hollow structure.

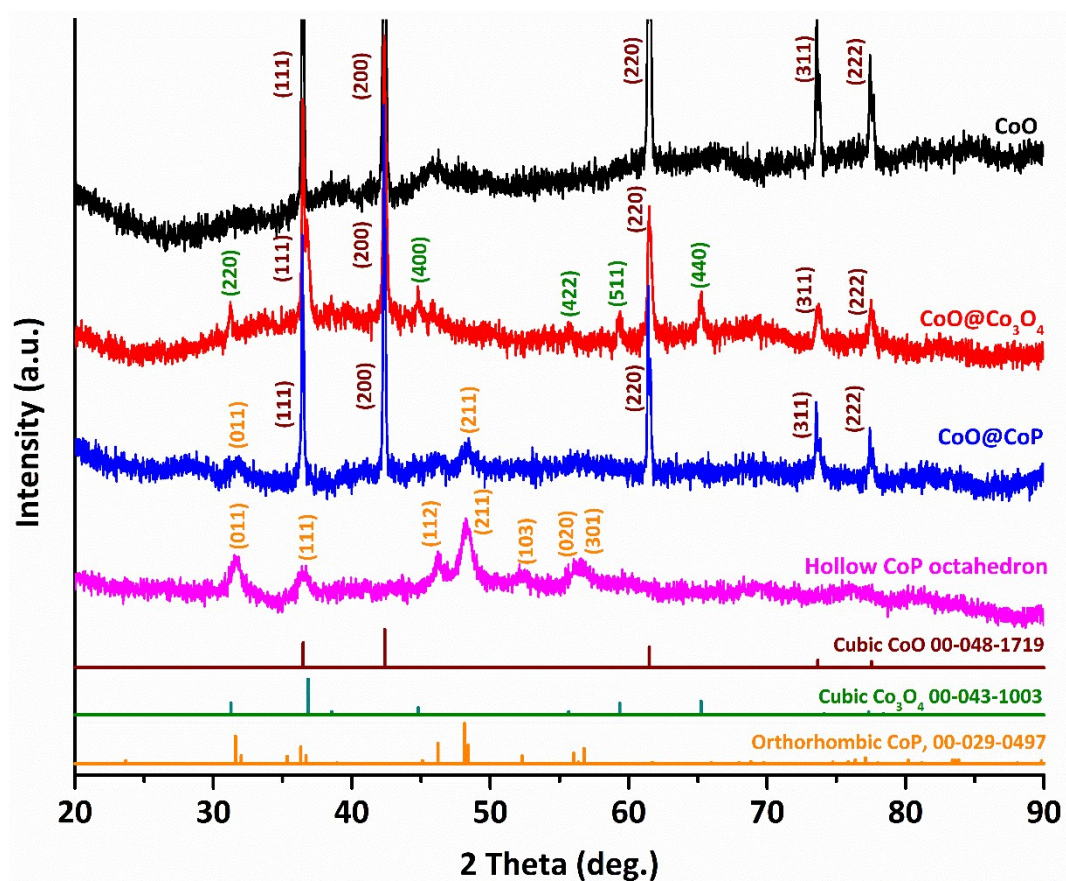

**Fig. S4.** XRD patterns of CoO, CoO@Co<sub>3</sub>O<sub>4</sub>, CoO@CoP and hollow CoP OCH pre-catalysts. The standard powder diffraction patterns of cubic CoO (ICDD No.00-048-1719), cubic Co<sub>3</sub>O<sub>4</sub> (ICDD No.00-043-1003) and orthorhombic CoP (ICDD No. 00-029-0497) are given for reference.

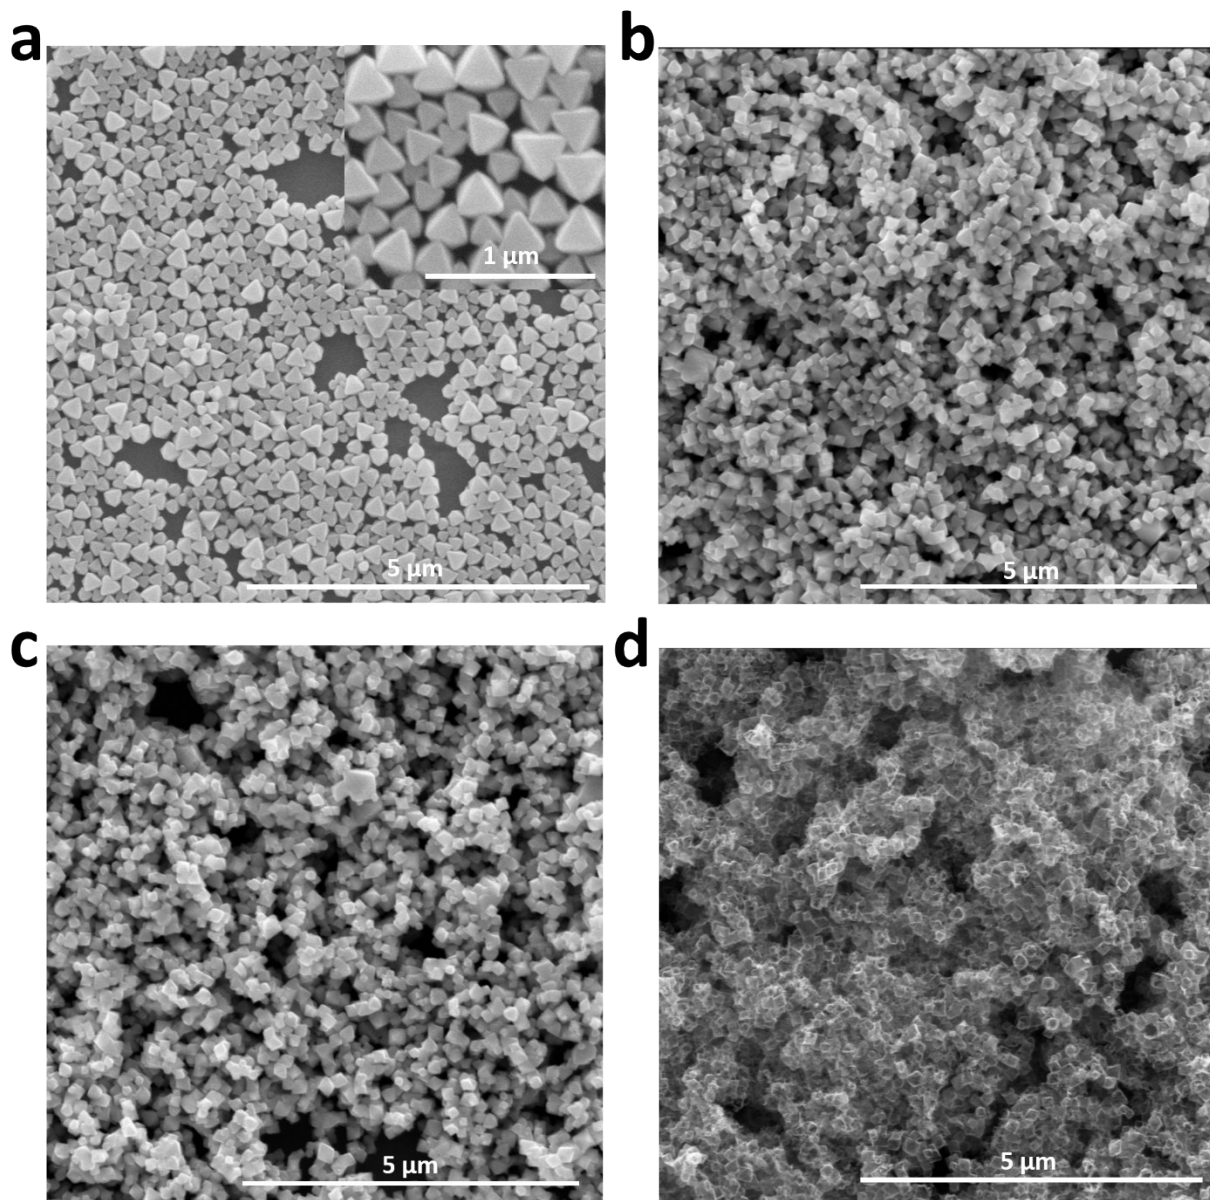

**Fig. S5.** SEM images showing the morphology of (a) CoO, (b) CoO@Co<sub>3</sub>O<sub>4</sub>, (c) CoO@CoP and (d) Hollow CoP OCHs.

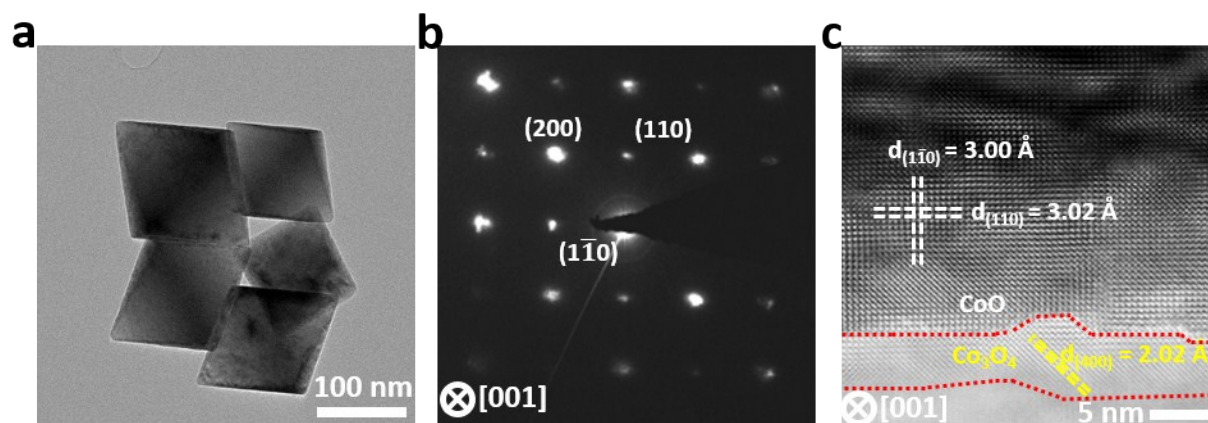

**Fig. S6.** TEM characterization of CoO@Co<sub>3</sub>O<sub>4</sub> OCHs.

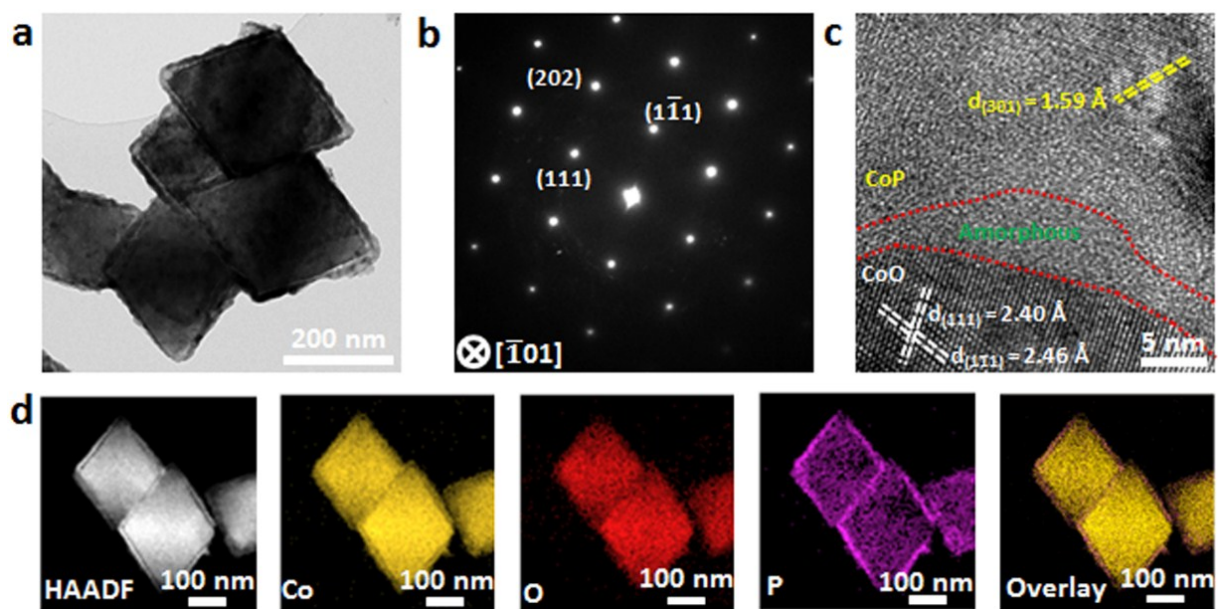

Fig. S7. TEM characterization of CoO@CoP OCHs.

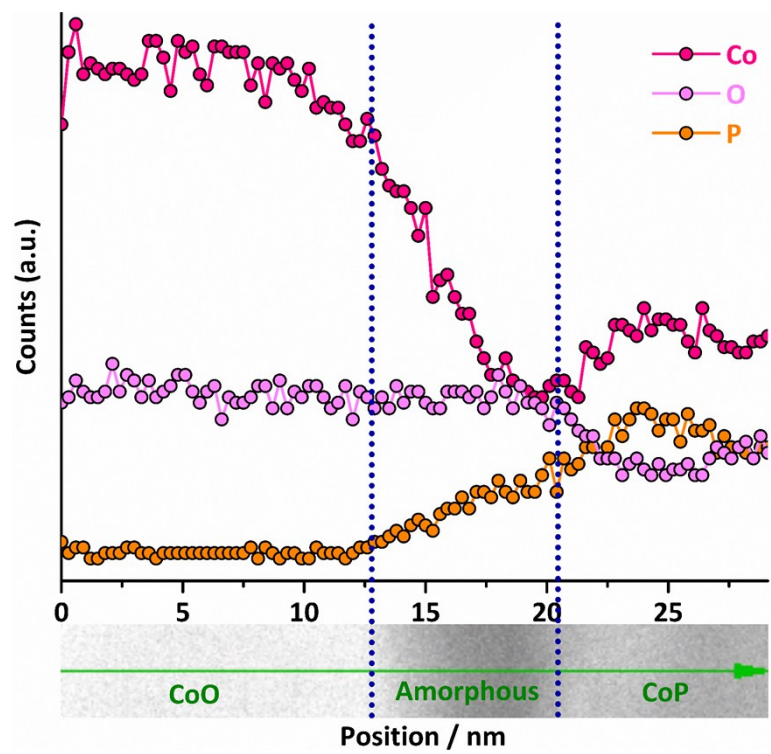

**Fig. S8.** TEM-EDX line scan over a single CoO@CoP OCH.

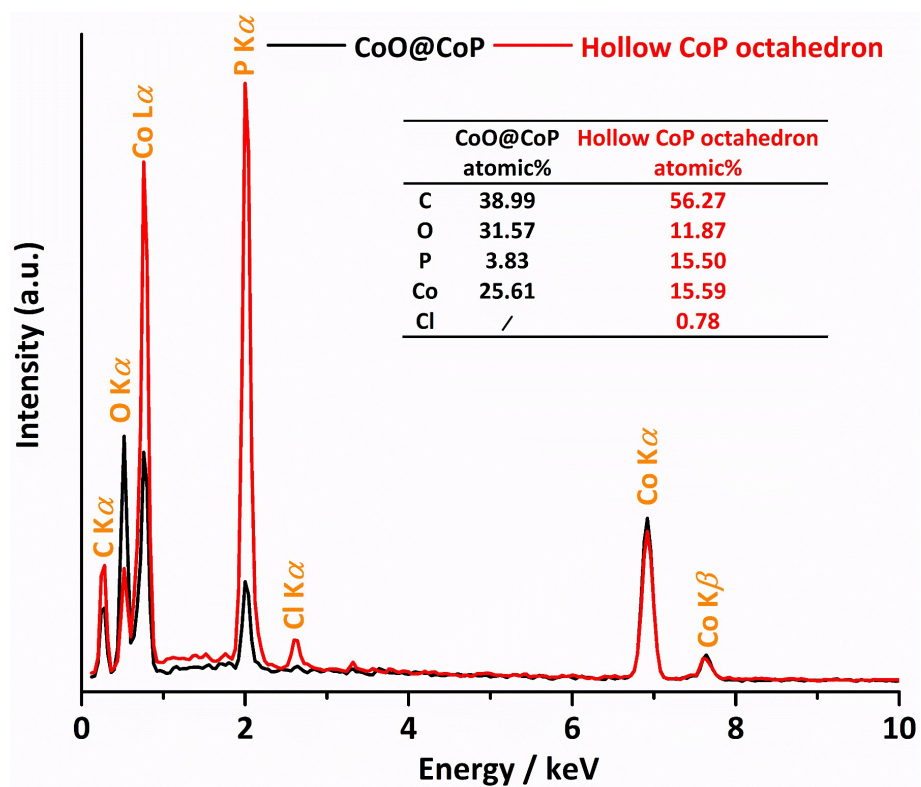

Fig. S9. EDX spectra of CoO@CoP and hollow CoP OCHs.



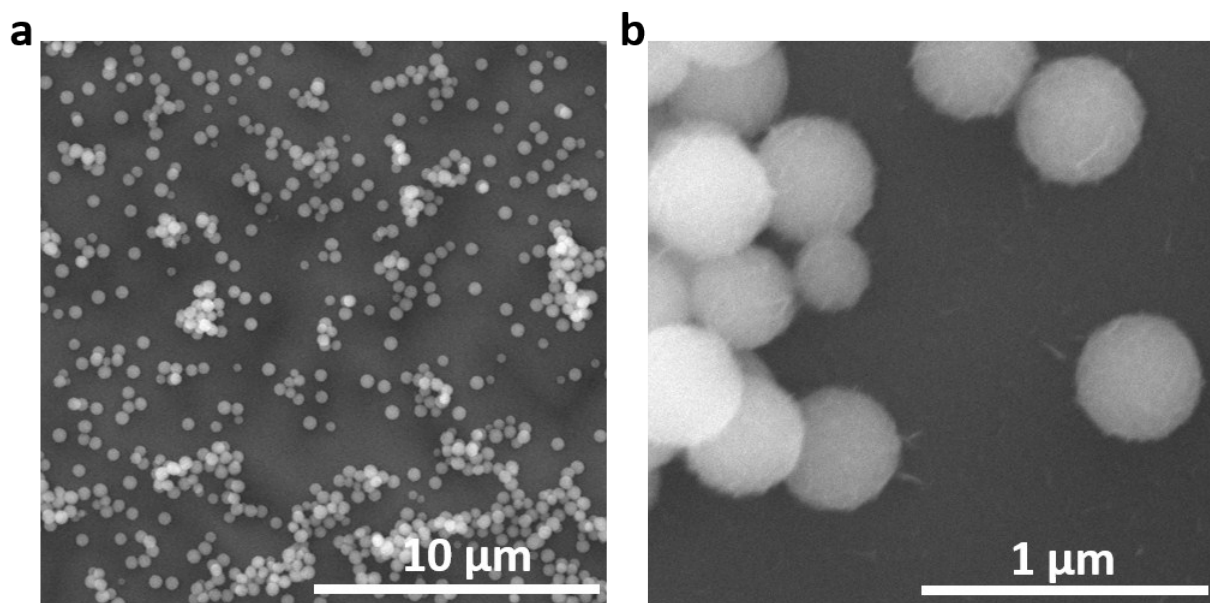

**Fig. S10.** SEM images showing the morphology of the Co-glycorate NS precursors. (a) Low-magnification and (b) high-magnification micrographs.

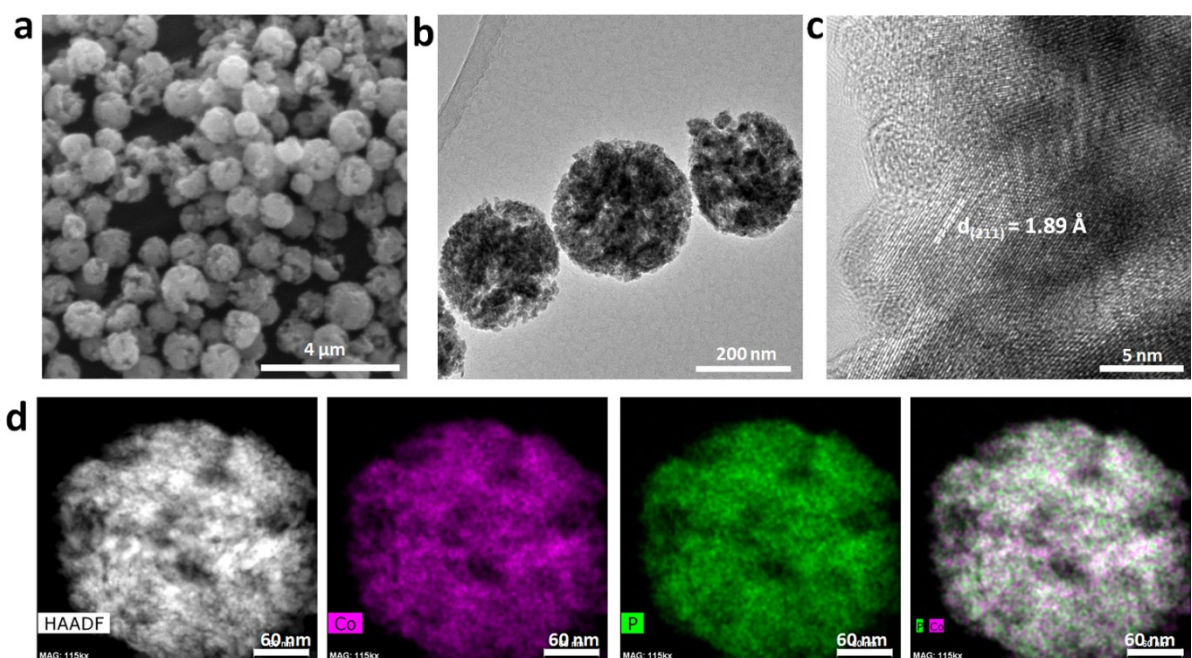

**Fig. S11.** Morphological, microstructural and compositional characterization of porous CoP NSs. (a) SEM image. (b) TEM, (c) HRTEM and (d) HAADF-STEM images and elemental maps of Co, P and their overlay.

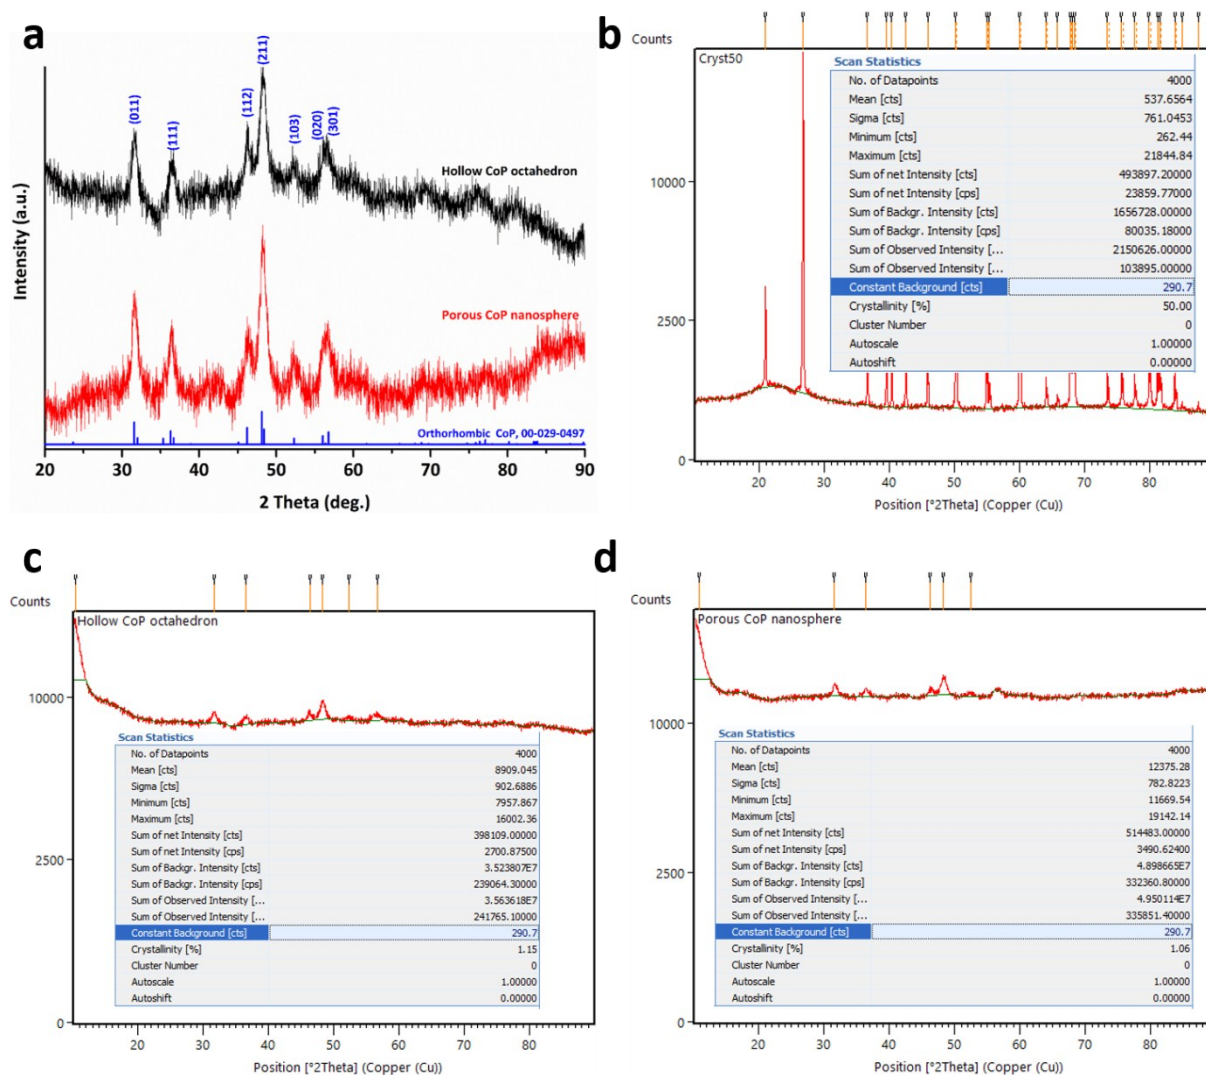

**Fig. S12.** (a) XRD patterns of hollow CoP OCH and porous CoP NS pre-catalysts. The standard powder diffraction pattern of orthorhombic CoP (ICDD No. 00-029-0497) is given for reference. (b) XRD pattern of the crystallinity calibration reference Cryst50. Crystallinity data of (c) Hollow CoP OCHs and (d) porous CoP NSs.

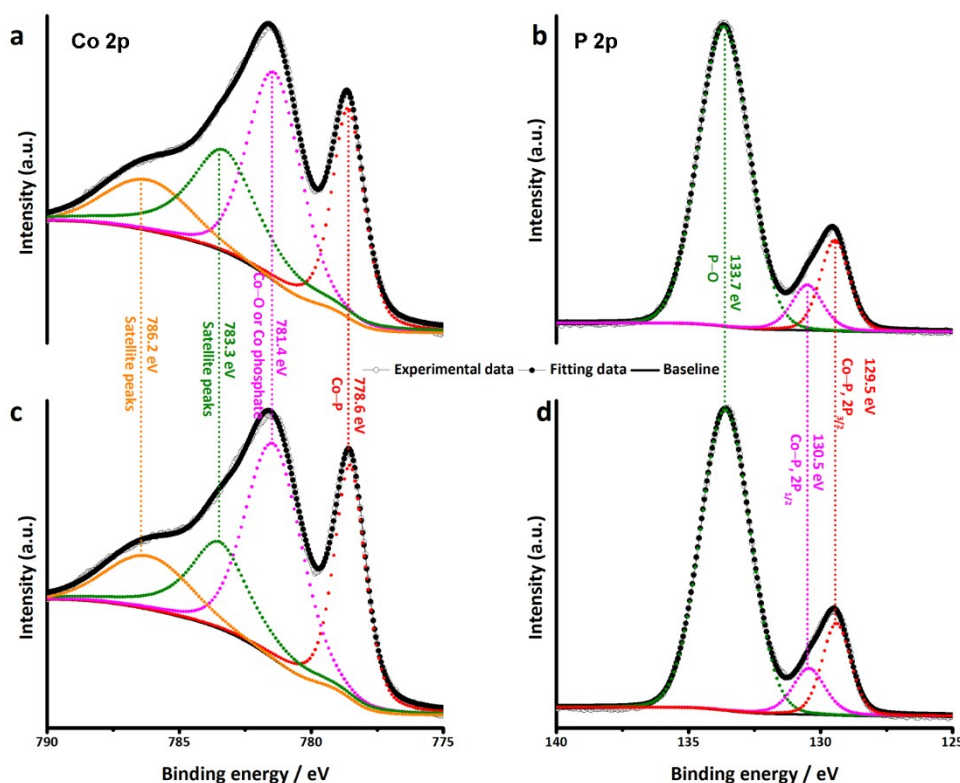

**Fig. S13.** (a) Co 2p and (b) P 2p XPS spectra of hollow CoP OCHs. (c) Co 2p and (d) P 2p XPS spectra of porous CoP NSs.

Fig. S13a and S13c are the high-resolution Co  $2p_{3/2}$  XPS spectra of hollow CoP OCHs and porous CoP NSs, respectively. Peak deconvolution shows two main peaks at 778.6 and 781.4 eV and two satellite peaks at 783.3 and 786.2 eV.<sup>[S6,S7]</sup> The characteristic binding energy (BE) peak at 778.6 eV generally relates to the Co 2p contribution of cobalt phosphides, which is a good indication of Co–P bond formation; while the BE peak at 781.4 eV may be associated with the oxidized Co species that likely result from the slight surface oxidation, as commonly observed in other transition metal phosphides.<sup>[S3,S8-S10]</sup> As far as the P 2p spectra are concerned (Fig. 13b and S13d), two BE peaks appear at 129.5 and 130.5 eV, which can be assigned to the low-valence P and the  $2p_{3/2}$  and  $2p_{1/2}$  core levels of central P atoms in phosphide, respectively,<sup>[S6-S11]</sup> confirming the formation of Co–P bonds. The peak located at 133.7 eV is assigned to P–O bonding, which should originate from surface oxidation upon exposing the samples to air.<sup>[S3,S6-S11]</sup>

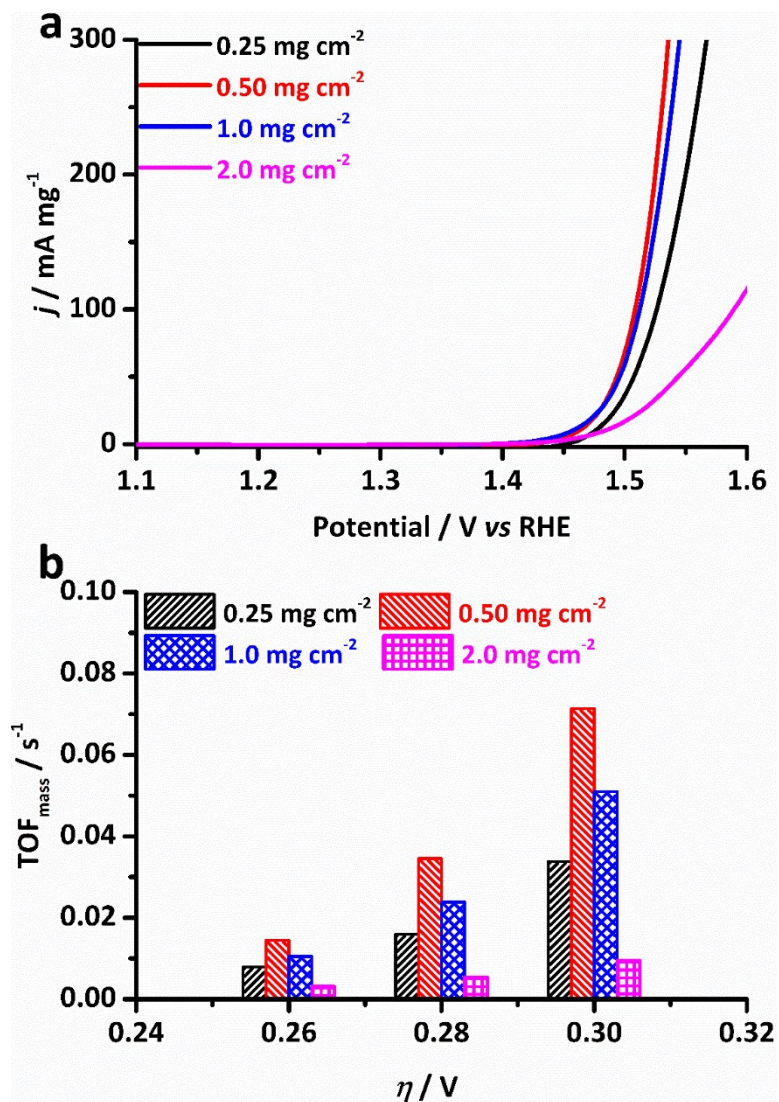

**Fig. S14.** (a) Mass activity of hollow CoP OCHs with different loadings. (b) Mass-based TOF values of hollow CoP OCHs with different loadings calculated at  $\eta = 260, 280$  and  $300$  mV.

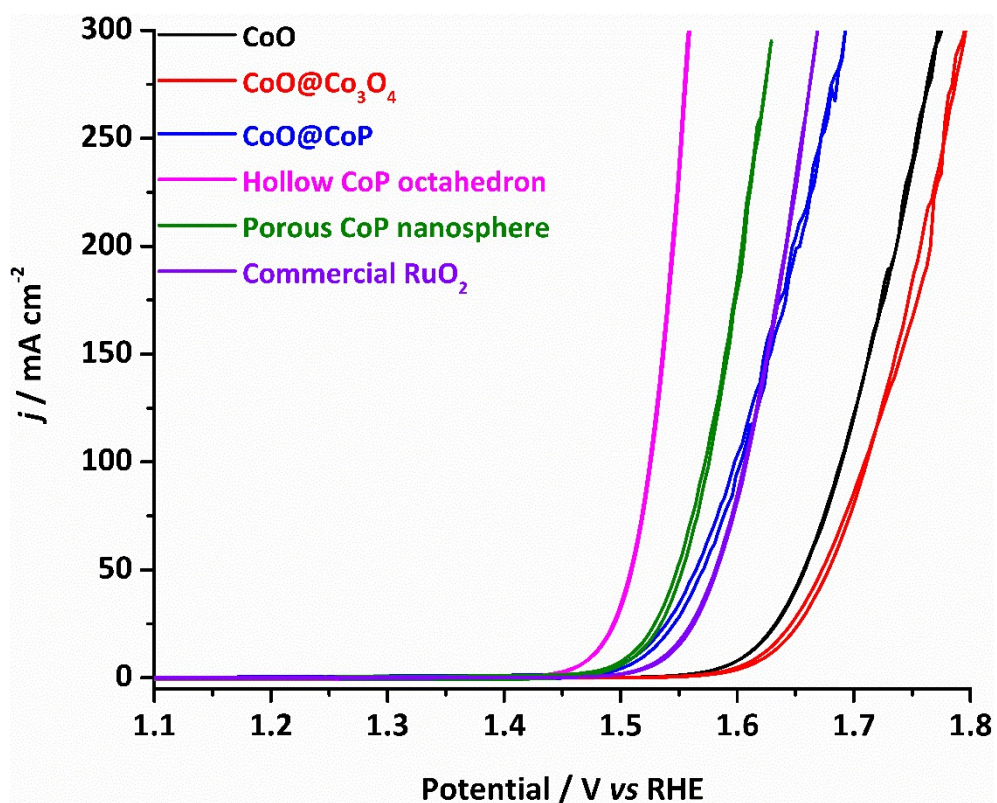

**Fig. S15.** The  $iR$ -corrected CV curves of CoO, CoO@Co<sub>3</sub>O<sub>4</sub>, CoO@CoP, hollow CoP OCHs, porous CoP NSs and commercial RuO<sub>2</sub> NPs recorded after pre-activation.

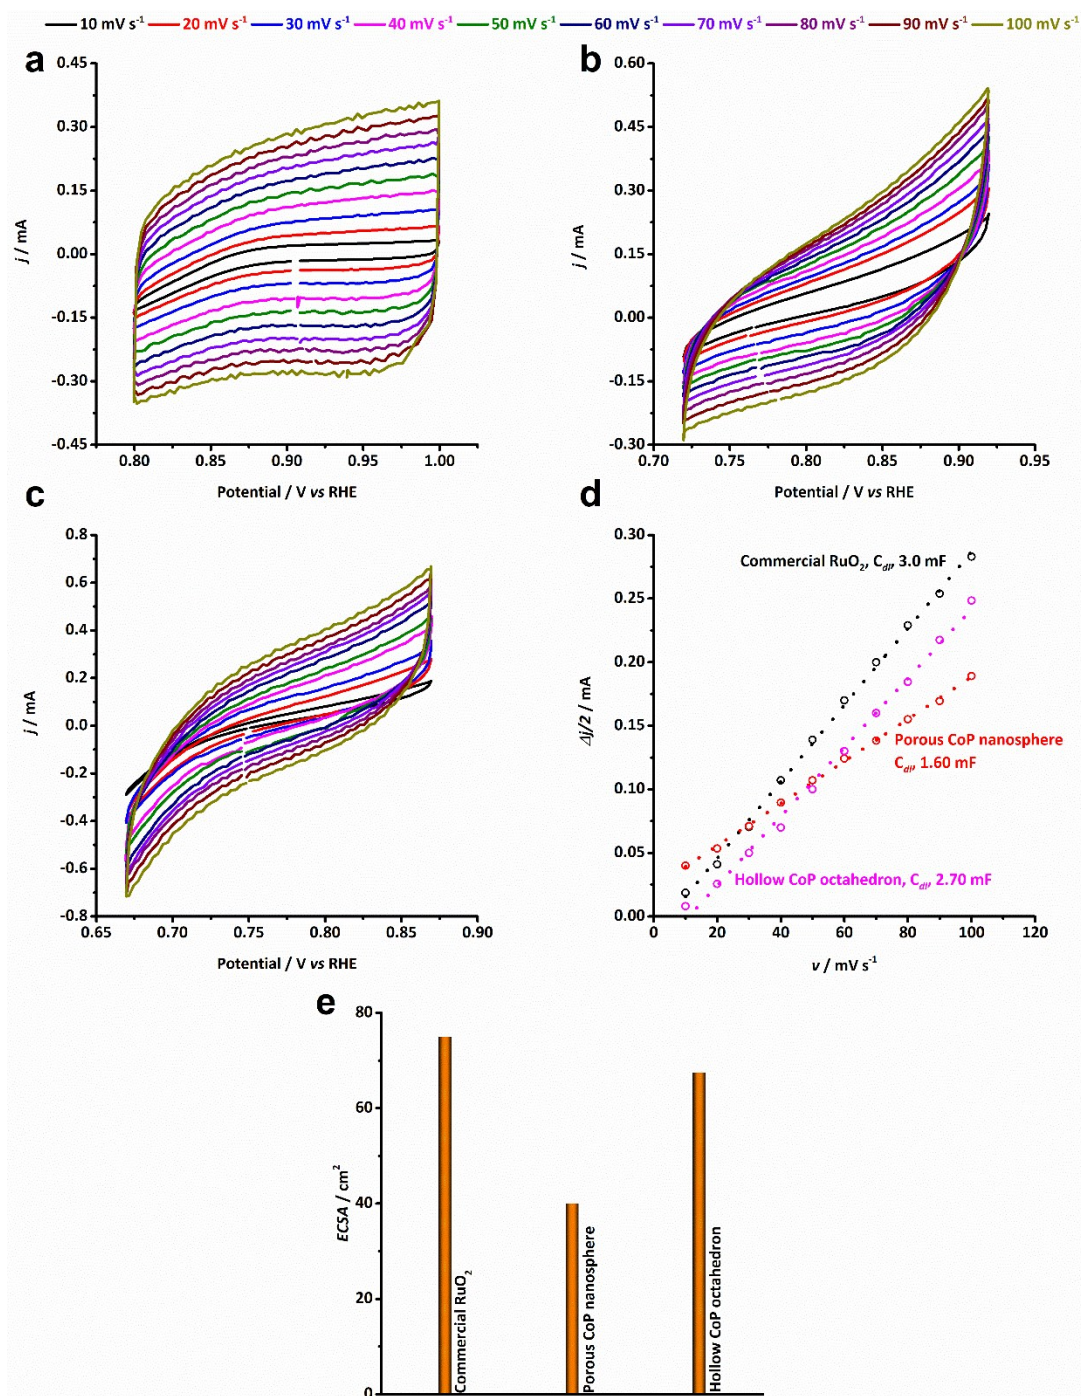

**Fig. S16.** Electrochemical CV curves of (a) commercial RuO<sub>2</sub> NP, (b) porous CoP NS and (c) hollow CoP OCH pre-catalysts recorded at different scan rates of 10, 20, 30, 40, 50, 60, 70, 80, 90 and 100 mV s<sup>-1</sup>. (d) Plots of the capacitive currents as a function of the scan rate for all pre-catalysts. (e) ECSAs of all pre-catalysts.

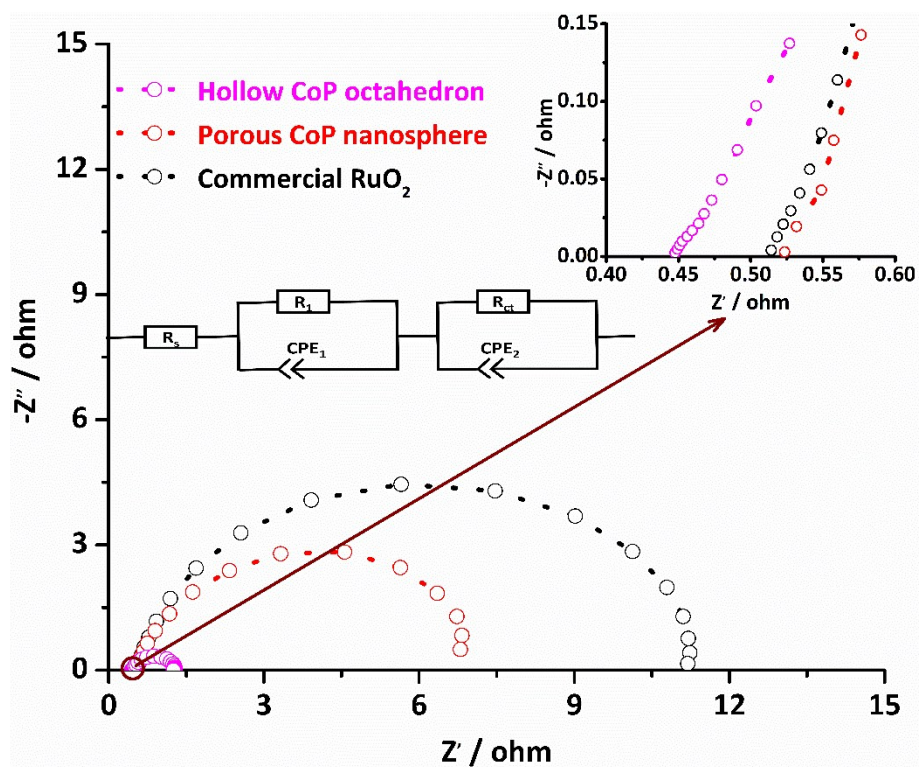

**Fig. S17.** The Nyquist plots of hollow CoP OCH, porous CoP NS and commercial RuO<sub>2</sub> NP precatalysts measured at 1.49 V vs RHE. The scattered open circles are experimental data and the dotted lines are fitting curves. The insets show the zoomed view of the plots in the high frequency regions (top) and the equivalent circuit model used for fitting (middle).  $R_s$  and  $R_{ct}$  represent the equivalent series resistance and charge transfer resistance, respectively. CPE stands for the constant phase element.



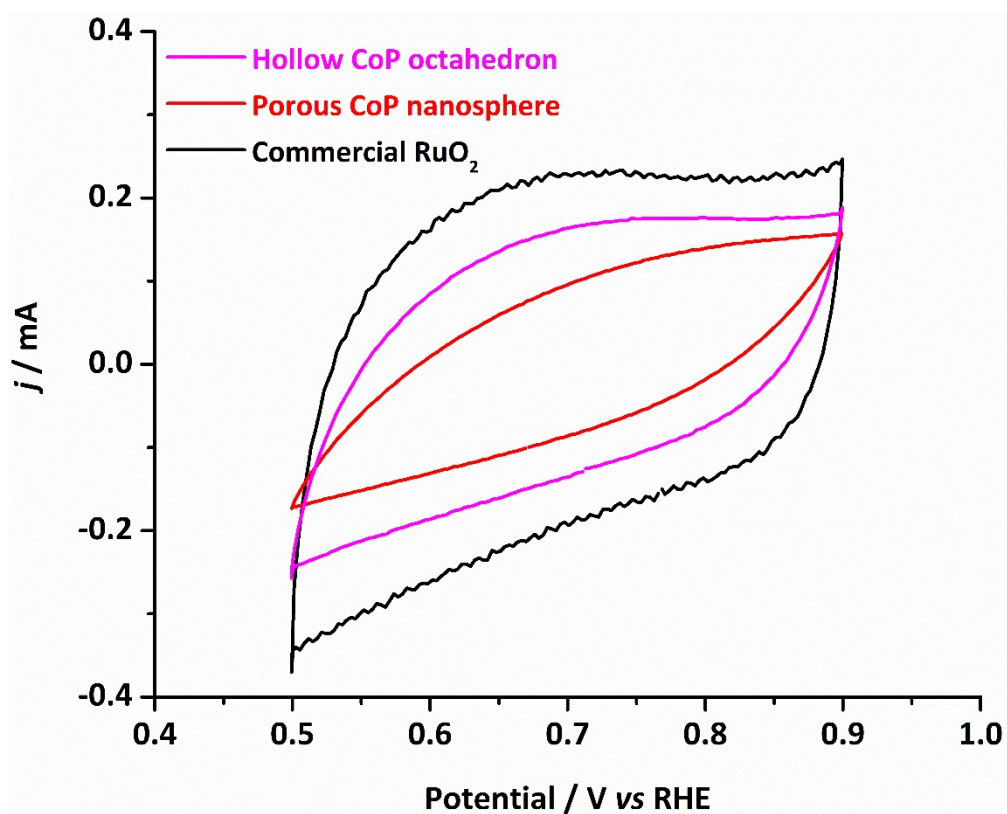

**Fig. S18.** CVs of hollow CoP OCH, porous CoP NS, and commercial RuO<sub>2</sub> NP pre-catalysts measured in PBS solution (pH = 7) at 50 mV s<sup>-1</sup>. The surface charges are 2170, 1520, and 3090  $\mu\text{C}$  for hollow CoP OCHs, porous CoP NSs, and commercial RuO<sub>2</sub> NPs, respectively.

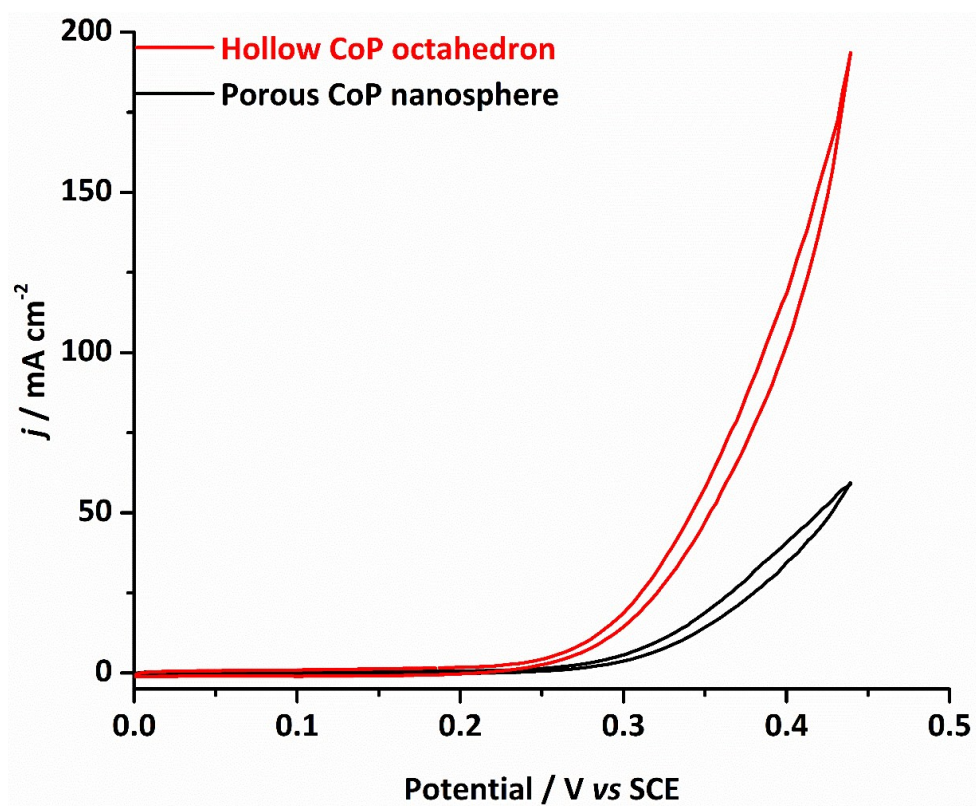

**Fig. S19.**  $iR$ -corrected CV curves of hollow CoP OCH and porous CoP NS pre-catalysts measured in 1.0 M KOH and 1.0 M methanol.

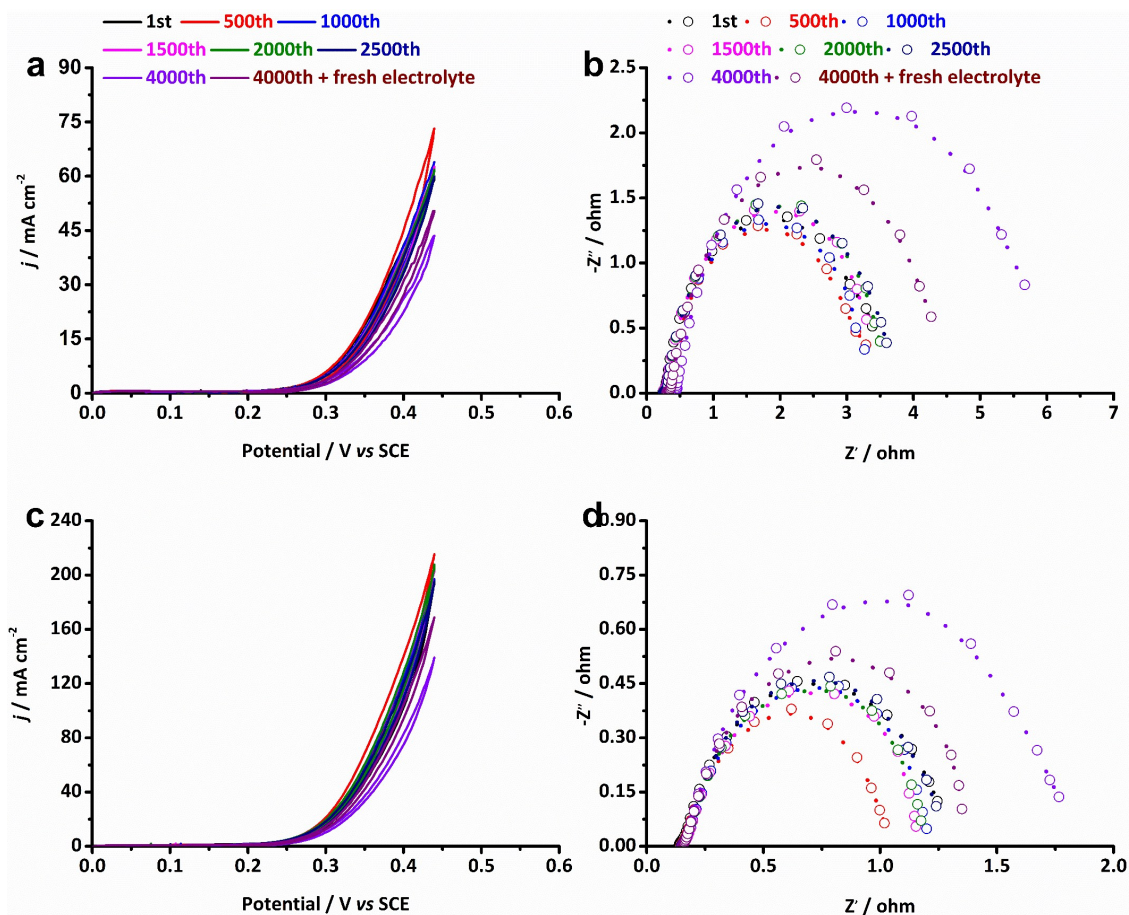

**Fig. S20.** (a) *iR*-corrected CV curves recorded at a scan rate of  $5 \text{ mV s}^{-1}$  and (b) Nyquist plots measured at  $0.35 \text{ V vs. SCE}$  in  $1.0 \text{ M KOH} + 1.0 \text{ M methanol}$  for porous CoP NSs after different voltammetry cycles in the potential range of  $0 - 0.35 \text{ V vs. SCE}$  at a scan rate of  $100 \text{ mV s}^{-1}$ . (c) *iR*-corrected CV curves recorded at a scan rate of  $5 \text{ mV s}^{-1}$  and (d) Nyquist plots measured at  $0.35 \text{ V vs. SCE}$  in  $1.0 \text{ M KOH} + 1.0 \text{ M methanol}$  for hollow CoP OCHs after different voltammetry cycles in the potential range of  $0 - 0.35 \text{ V vs. SCE}$  at a scan rate of  $100 \text{ mV s}^{-1}$ .

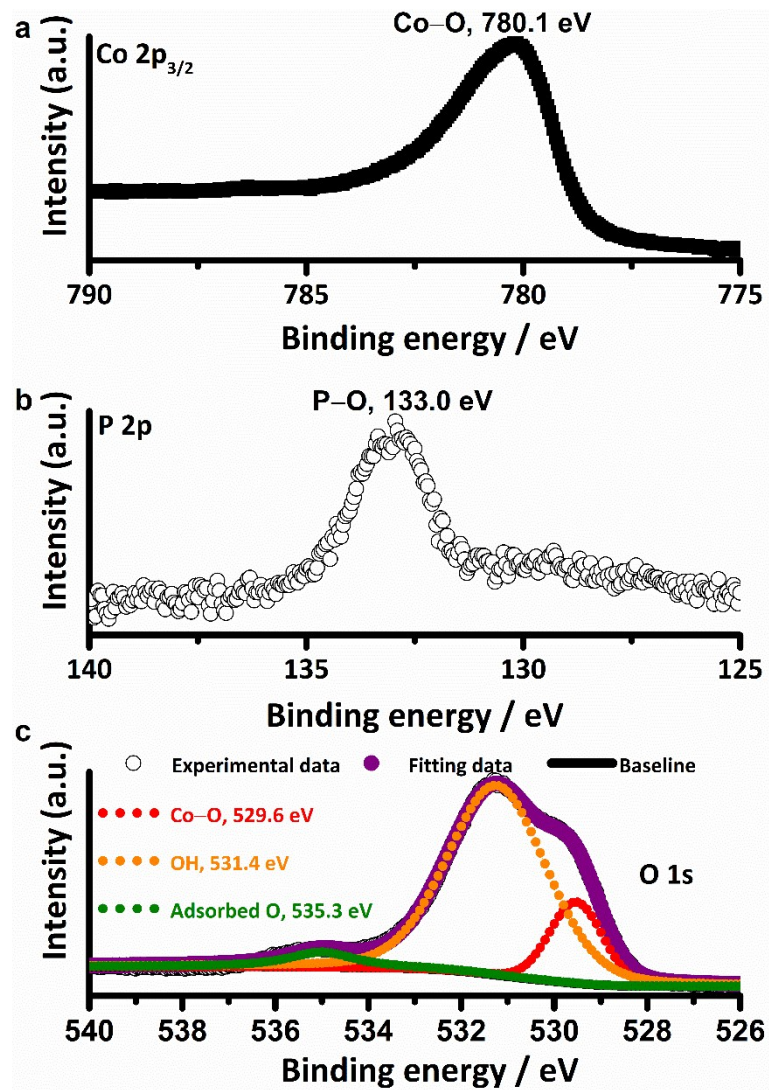

**Fig. S21.** (a) Co 2p<sub>3/2</sub>, (b) P 2p and (c) O 1s XPS spectra of hollow CoP OCHs after the OER test at 10 mA cm<sup>-2</sup> for 60 h.

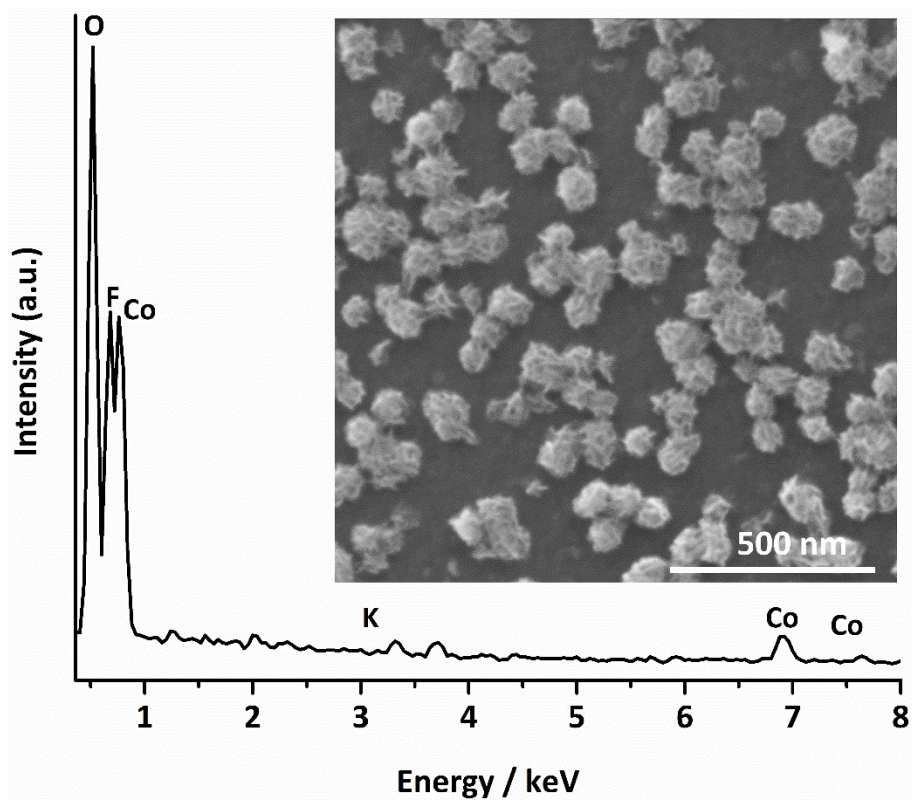

**Fig. S22.** SEM image and EDX spectrum of hollow CoP OCHs after the OER test at  $10 \text{ mA cm}^{-2}$  for 60 h.

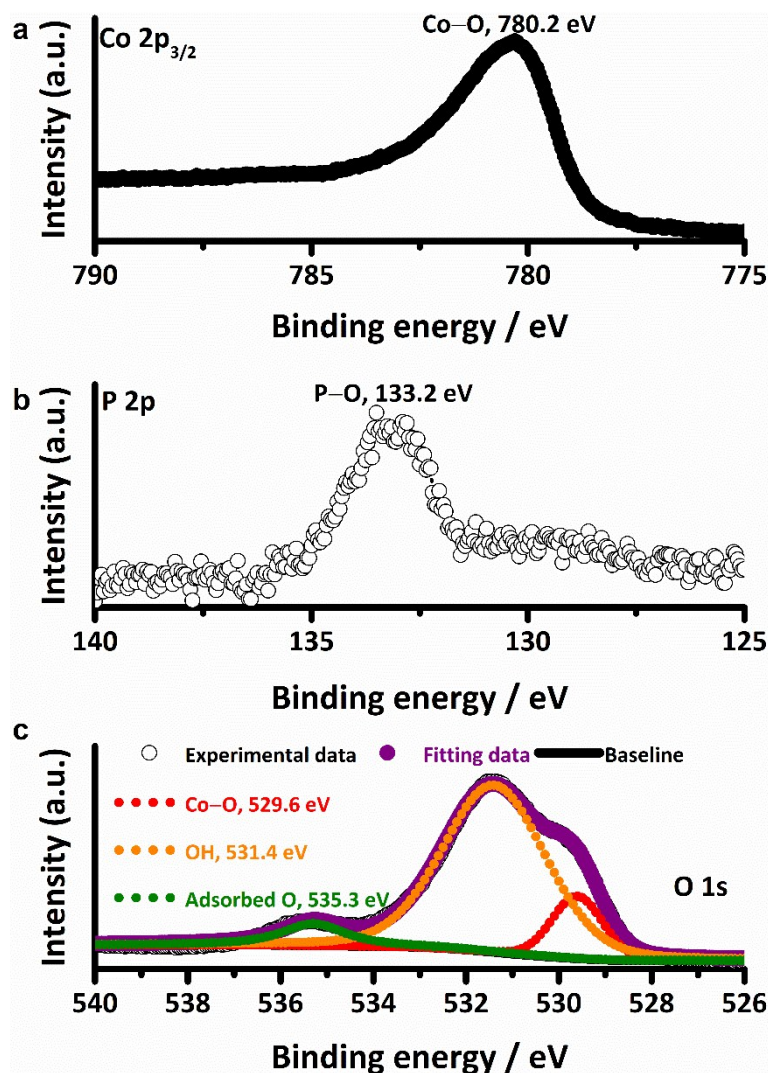

**Fig. S23.** (a) Co 2p<sub>3/2</sub>, (b) P 2p and (c) O 1s XPS spectra of hollow CoP OCHs after 4000 CV cycles in 1.0 M KOH + 1.0 M methanol in the potential range of 0 – 0.35 V vs. SCE at 100 mV s<sup>-1</sup>.

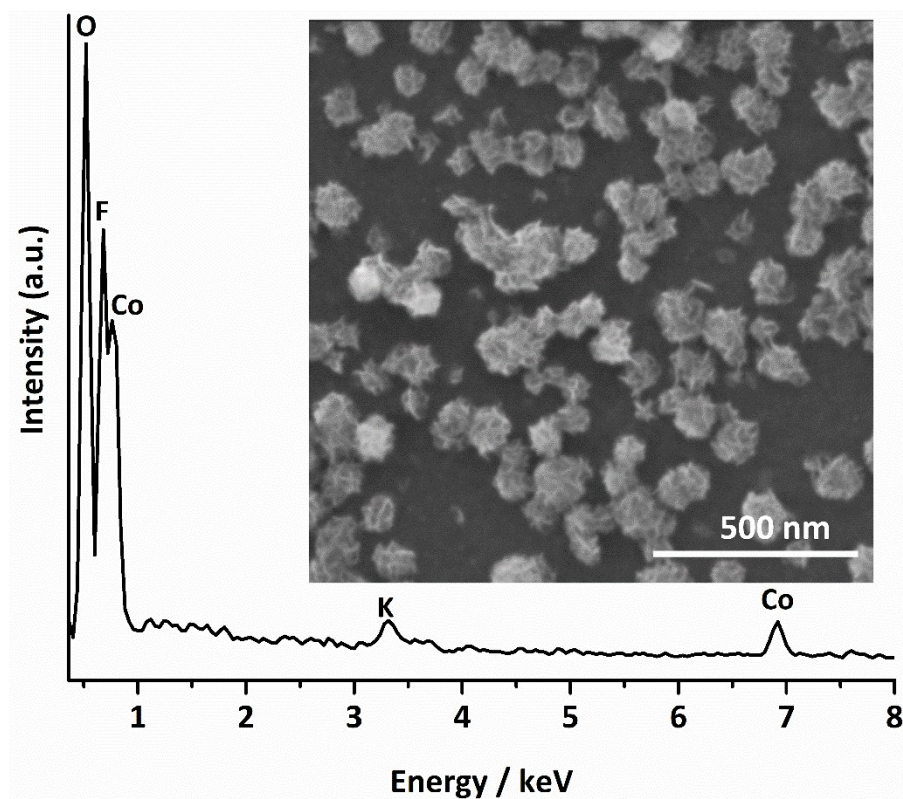

**Fig. S24.** SEM image and EDX spectrum of hollow CoP OCHs after 4000 CV cycles in 1.0 M KOH + 1.0 M methanol in the potential range of 0 – 0.35 V vs. SCE at  $100 \text{ mV s}^{-1}$ .

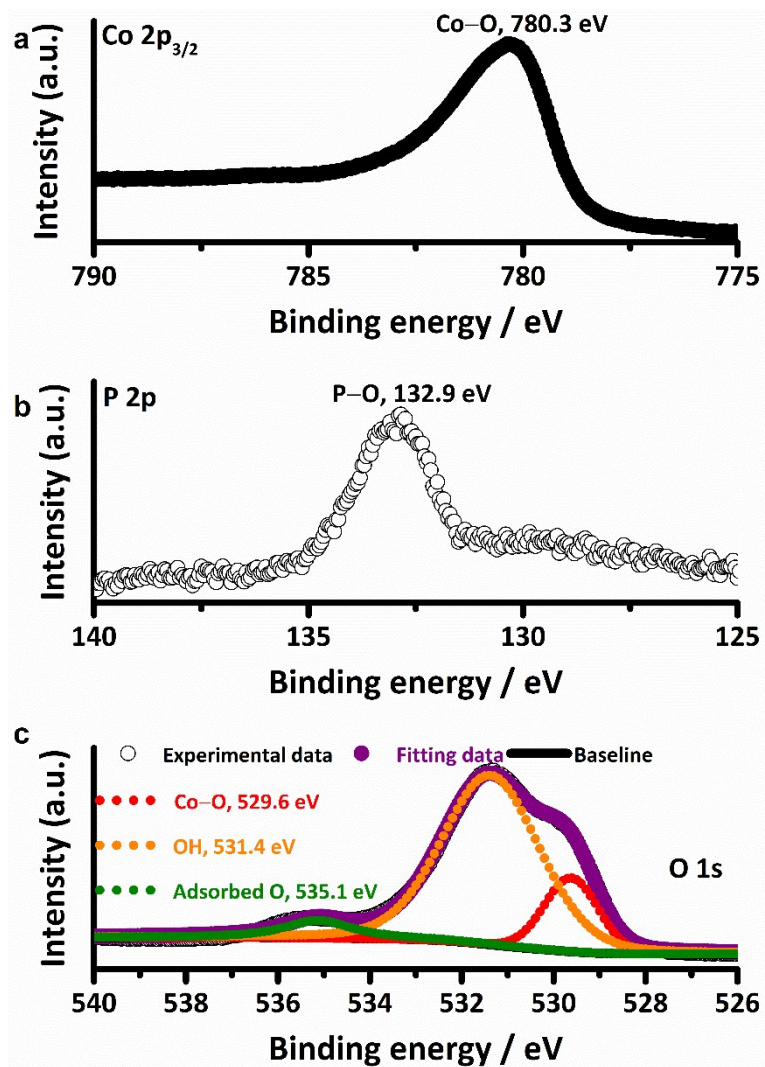

**Fig. S25.** (a) Co 2p<sub>3/2</sub>, (b) P 2p and (c) O 1s XPS spectra of porous CoP NSs after the OER test at 10 mA cm<sup>-2</sup> for 60 h.



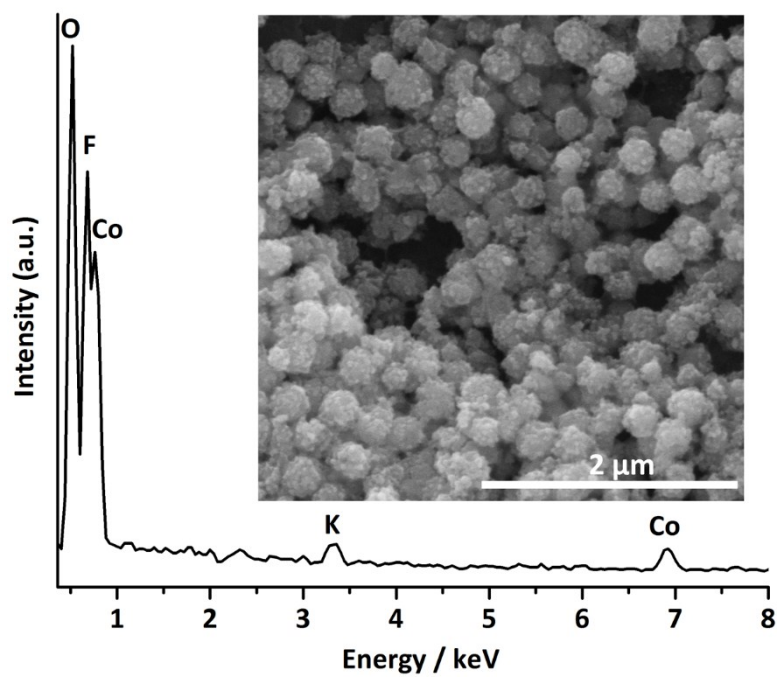

**Fig. S26.** SEM image and EDX spectrum of porous CoP NSs after the OER test at  $10 \text{ mA cm}^{-2}$  for 60 h.

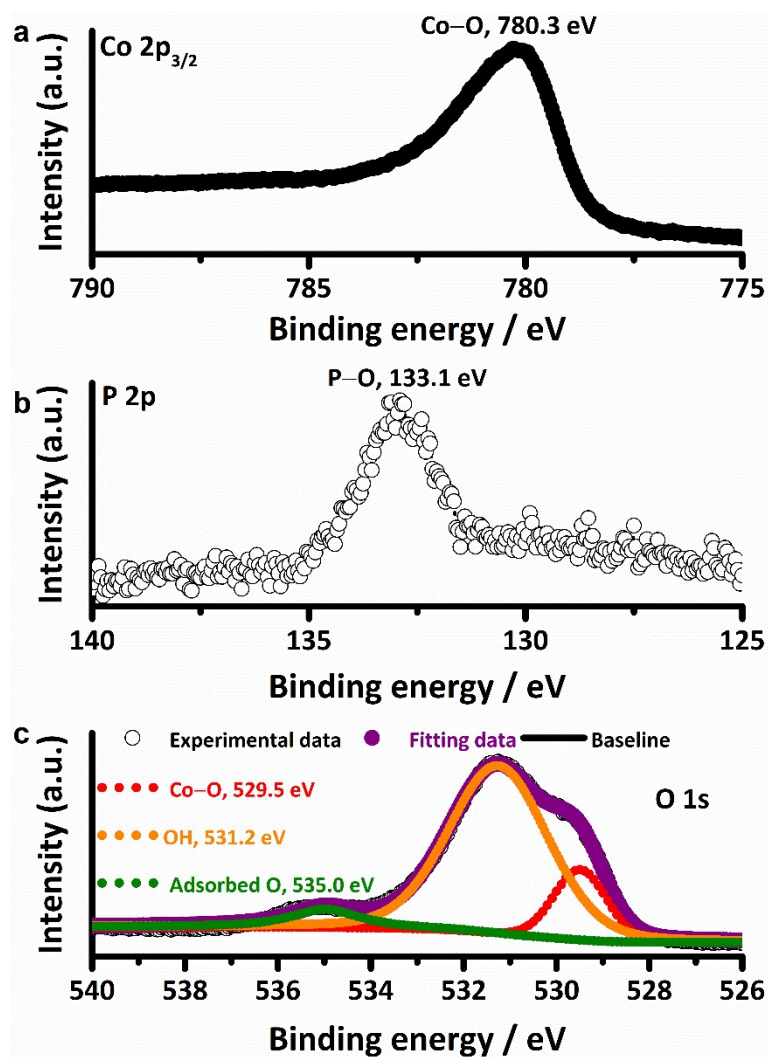

**Fig. S27.** (a) Co 2p<sub>3/2</sub>, (b) P 2p and (c) O 1s XPS spectra of porous CoP NSs after 4000 CV cycles in 1.0 M KOH + 1.0 M methanol in the potential range of 0 – 0.35 V vs. SCE at 100 mV s<sup>-1</sup>.

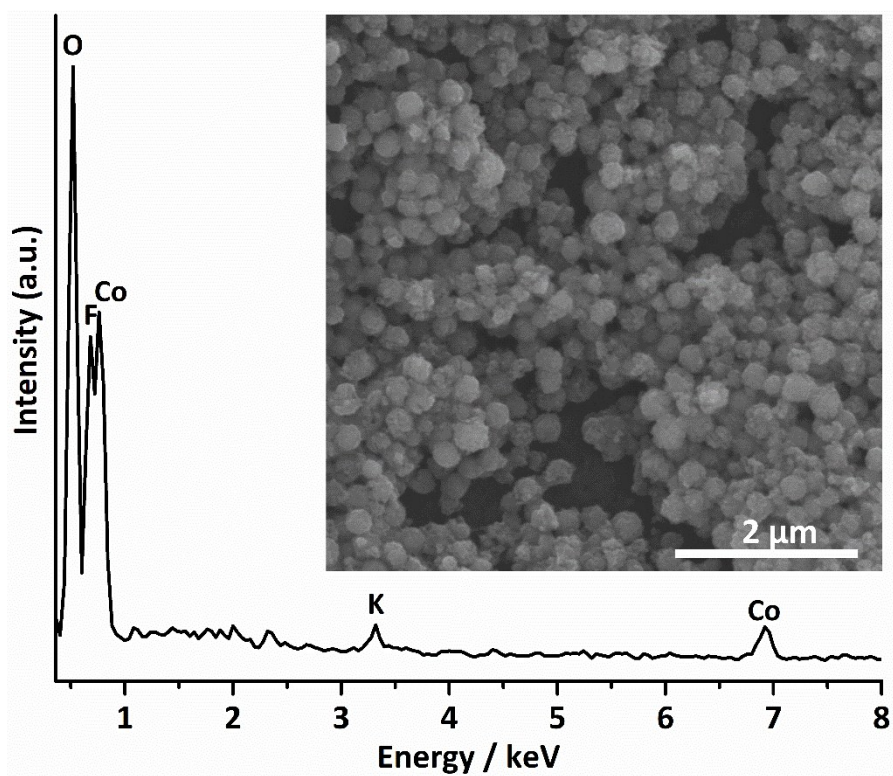

**Fig. S28.** SEM image and EDX spectrum of porous CoP NSs after 4000 CV cycles in 1.0 M KOH + 1.0 M methanol in the potential range of 0 – 0.35 V vs. SCE at  $100 \text{ mV s}^{-1}$ .

**Table S1.** Comparison of the OER performance of hollow CoP OCHs with those of other advanced OER catalysts tested in 1.0 M KOH electrolyte.

| Catalysts                                                                   | Substrate               | Loading (mg cm <sup>-2</sup> ) | $\eta_{10}$ (mV) <sup>a</sup> | $j_{300}$ (mA cm <sup>-2</sup> ) <sup>b</sup> | Tafel slope (mV dec <sup>-1</sup> ) | $TOF_{300}$ (s <sup>-1</sup> ) <sup>c</sup> | References                                         |
|-----------------------------------------------------------------------------|-------------------------|--------------------------------|-------------------------------|-----------------------------------------------|-------------------------------------|---------------------------------------------|----------------------------------------------------|
| Hollow CoP OCHs                                                             | Carbon paper            | 0.50                           | 240                           | 155                                           | 38                                  | 0.072                                       | This work                                          |
| Porous CoP NSs                                                              | Carbon paper            | 0.50                           | 280                           | 22                                            | 45                                  | 0.01                                        | This work                                          |
| Fe <sub>10</sub> Co <sub>40</sub> Ni <sub>40</sub> P nanosheet              | Glassy carbon           | 3.10                           | 250                           | ca.105                                        | 44                                  | ca.<br>0.007                                | RSC Adv. <b>2016</b> , 6, 9647.                    |
| Ni <sub>1.5</sub> Fe <sub>0.5</sub> P nanosheet                             | Carbon paper            | 1.38                           | 264                           | ca.112                                        | 55                                  | ca.<br>0.014                                | Nano Energy <b>2017</b> , 34, 472.                 |
| Co <sub>0.7</sub> Fe <sub>0.3</sub> P/CNT nanoparticle                      | Carbon paper            | 0.50                           | 243                           | /                                             | 36                                  | /                                           | Adv. Funct. Mater. <b>2017</b> , 27, 1606635.      |
| Fe <sub>1.1</sub> Mn <sub>0.9</sub> P nanorod                               | Glassy carbon           | 0.284                          | 440                           | /                                             | 39                                  | /                                           | Chem. Mater. <b>2017</b> , 29, 3048.               |
| Al-CoP nanoarray                                                            | Carbon cloth            | 5.7                            | 265                           | ca. 50                                        | 51                                  | ca.<br>0.0015                               | Nanoscale <b>2017</b> , 9, 4793                    |
| FeCoP nanoarray                                                             | Ti foil                 | 1.03                           | 230                           | ca.90                                         | 67                                  | ca.<br>0.013                                | Adv. Mater. <b>2017</b> , 29, 1602441.             |
| Co <sub>4</sub> Ni <sub>1</sub> P nanotube                                  | Rotating disk electrode | 0.19                           | 245                           | ca. 20                                        | 61                                  | 0.032                                       | Adv. Funct. Mater. <b>2017</b> , 27, 1703455.      |
| Fe-Ni-P/rGO nanoparticle                                                    | Rotating disk electrode | 0.30                           | 240                           | ca. 40                                        | 63                                  | ca.<br>0.048                                | ACS Appl. Mater. Interfaces <b>2017</b> , 9, 23852 |
| NiCoP/C nanobox                                                             | Glassy carbon           | ca. 0.25                       | 330                           | < 5                                           | 96                                  | <<br>0.004                                  | Angew. Chem. Int. Ed. <b>2017</b> , 56, 3897.      |
| h-CoNiP/rGO nanoparticle                                                    | Glassy carbon           | 0.21                           | 280                           | < 20                                          | 65.2                                |                                             | Electrochem. Commun. <b>2017</b> , 83, 85          |
| NiCoP/NC PHC nanoparticle                                                   | Rotating disk electrode | 0.28                           | 297                           | ca. 10                                        | 51                                  |                                             | J. Mater. Chem. A <b>2017</b> , 5, 18839           |
| (Ni <sub>x</sub> Fe <sub>1-x</sub> ) <sub>2</sub> P hollow nanocubes        | Glassy carbon           | 0.30                           | 290                           | ca.12                                         | 44                                  | ca.<br>0.008                                | Catal. Sci. Technol. <b>2017</b> , 7, 1549         |
| N doped C/Ni <sub>5</sub> P <sub>4</sub> /Fe <sub>3</sub> P hollow nanocube | Graphite electrode      | 0.50                           | 252                           | ca. 40                                        | 24                                  | ca.<br>0.016                                | J. Mater. Chem. A <b>2017</b> , 5, 19656           |
| Co-Fe-P nanoparticle                                                        | Ni foam                 | 1.0                            | 244                           | ca. 50                                        | 58                                  | ca.<br>0.01                                 | ACS Appl. Mater. Interfaces, <b>2017</b> , 9, 362. |
| CoNiP nanoparticle                                                          | Glassy carbon           | 0.210                          | 375                           | < 2                                           | 76                                  | < 0.002                                     | Electrochem. Commun. <b>2017</b> , 79, 41.         |
| NiCoP nanoplate                                                             | Ni foam                 | 1.60                           | 280                           | ca. 35                                        | 87                                  | 3.88 <sup>d</sup>                           | Nano Lett. <b>2016</b> , 16, 7718.                 |
| Mesoporous Co <sub>3</sub> Ni <sub>1</sub> P                                | Rotating disk electrode | ca. 0.20                       | 280                           | ca.15                                         | 66.50                               | ca.<br>0.050                                | ACS Energy Lett. <b>2016</b> , 1, 792.             |
| O-CoP/GO nanoparticle                                                       | Glassy carbon           | 0.28                           | 280                           | ca. 14                                        | 75                                  | 0.01                                        | J. Am. Chem. Soc. <b>2016</b> , 138, 14686.        |
| Nanoporous (Co <sub>0.52</sub> Fe <sub>0.48</sub> ) <sub>2</sub> P          | CoFe ribbon             | /                              | 270                           | ca. 95                                        | 30                                  | /                                           | Energy Environ. Sci. <b>2016</b> , 9, 2257.        |
| NiCoP/RGO nanoparticle                                                      | Carbon paper            | 0.15                           | 270                           | ca. 20                                        | 65.7                                | ca.<br>0.047                                | Adv. Funct. Mater. <b>2016</b> , 26, 6785.         |
| Ni <sub>0.51</sub> Co <sub>0.49</sub> P film                                | Ni foam                 | /                              | 239                           | ca. 80                                        | 45                                  | /                                           | Adv. Funct. Mater. <b>2016</b> , 26, 7644.         |
| NiCoP nanosheet array                                                       | Ni foam                 | /                              | /                             | ca. 50                                        | /                                   | /                                           | Nano Res. <b>2016</b> , 9, 2251.                   |
| CoMnP nanoparticle                                                          | Glassy carbon           | 0.284                          | 330                           | ca. 5                                         | 61                                  | ca.<br>0.004                                | J. Am. Chem. Soc. <b>2016</b> , 138, 4006.         |
| (Co <sub>0.54</sub> Fe <sub>0.46</sub> ) <sub>2</sub> P nanoparticle        | Glassy carbon           | 0.20                           | 370                           | < 1                                           | /                                   | < 0.001                                     | Angew. Chem. Int. Ed. <b>2015</b> , 54, 9642.      |
| Amorphous Co-Fe-P nanosphere                                                | Carbon paper            | 0.20                           | 217                           |                                               | 40                                  |                                             | J. Mater. Chem. A <b>2017</b> , 5, 25378.          |
| Ni-Co-P nanosphere                                                          | Carbon paper            | 3.5                            | 310                           | ca. 7                                         | 70                                  | ca.<br>0.0004                               | Nanoscale <b>2016</b> , 8, 19129                   |
| FeP nanotube                                                                | Carbon cloth            | /                              | 288                           | ca. 18                                        | 43                                  | /                                           | Chem. Eur. J. <b>2015</b> , 21, 18062.             |
| FeP nanorod                                                                 | Carbon paper            | 0.70                           | 350                           | < 5                                           | 63.6                                | ca.<br>0.002                                | Chem. Commun. <b>2016</b> , 52, 8711.              |
| FeP-FeP <sub>x</sub> O <sub>y</sub> nanotube                                | Glassy carbon           | 0.30                           | 280                           | ca. 23                                        | 48                                  | ca.<br>0.02                                 | ACS Appl. Nano Mater. <b>2018</b> , 1, 617         |
| CoP nanoparticle                                                            | Glassy carbon           | ca. 0.40                       | 310                           | ca. 9                                         | 70                                  | /                                           | J. Am. Chem. Soc. <b>2018</b> , 140, 2610          |
| CoP film                                                                    | Cu foil                 | /                              | 345                           | < 5                                           | 47                                  | /                                           | Angew. Chem. Int. Ed.                              |

|                                                     |                         |       |         |         |      |            |                                                                              |
|-----------------------------------------------------|-------------------------|-------|---------|---------|------|------------|------------------------------------------------------------------------------|
| CoP mesoporous nanorod array                        | Ni foam                 | /     | 290     | ca. 30  | 65   | /          | <b>2015</b> , 54, 6251.<br><i>Adv. Funct. Mater.</i> <b>2015</b> , 25, 7337. |
| CoP nanorod                                         | Glassy carbon           | 0.71  | 320     | ca. 5   | 71   | ca. 0.002  | <i>ACS Catal.</i> <b>2015</b> , 5, 6874.                                     |
| CoP nanowire                                        | Co foam                 | /     | 248     | 100     | 78   | /          | <i>Chem. Sci.</i> <b>2017</b> , 8, 2952.                                     |
| CoP <sub>3</sub> nanosphere                         | Carbon cloth            |       | 291     | ca. 12  | 72   |            | <i>J ALLOY COMPD.</i> <b>2017</b> , 729, 203                                 |
| Co-P nanosphere                                     | FTO                     |       | 420     | < 5     | 83   |            | <i>RSC Adv.</i> <b>2016</b> , 6, 52761                                       |
| Porous urchin-Like Ni <sub>2</sub> P                | Ni foam                 | /     | 200     | ca. 120 | /    | ca. 0.003  | <i>ACS Catal.</i> <b>2016</b> , 6, 714.                                      |
| Carbon coated porous Ni-P nanoplate                 | Rotating disk electrode | 0.20  | 300     | 10      | 64   | ca. 0.010  | <i>Energy Environ. Sci.</i> <b>2016</b> , 9, 1246.                           |
| N <sub>2</sub> P nanowire                           | Glassy carbon           | 0.14  | 290     | ca. 15  | 47   | ca. 0.021  | <i>Energy Environ. Sci.</i> <b>2015</b> , 8, 2347                            |
| Ni <sub>2</sub> P                                   | Carbon paper            | 1.33  | 280     | ca. 24  | 48   | ca. 0.007  | <i>ACS Catal.</i> <b>2017</b> , 7, 5450                                      |
| CoO <sub>x</sub> @CN nanoparticle                   | Ni foam                 | 2.10  | 260     | ca. 20  | /    | ca. 0.002  | <i>J. Am. Chem. Soc.</i> <b>2015</b> , 137, 2688.                            |
| Porous MoO <sub>2</sub> nanosheet                   | Ni foam                 | 2.90  | 260     | ca. 30  | /    | ca. 0.0025 | <i>Adv. Mater.</i> <b>2016</b> , 28, 3785.                                   |
| Ni <sub>0.75</sub> V <sub>0.25</sub> -LDH nanosheet | Glassy carbon           | 0.143 | 300     | 10      | 50   | ca. 0.0216 | <i>Nat. Commun.</i> <b>2016</b> , 7, 11981.                                  |
| VOOH Hollow NS                                      | Ni foam                 | 0.80  | 270     | ca. 25  | 68   | ca. 0.006  | <i>Angew. Chem. Int. Ed.</i> <b>2017</b> , 56, 573.                          |
| Ni <sub>3</sub> C/C nanoparticle                    | Carbon paper            | 0.285 | ca. 310 |         | 46   | ca. 0.009  | <i>Adv. Mater.</i> <b>2016</b> , 28, 3326.                                   |
| Fe-Ni <sub>3</sub> C nanodot                        | Glassy carbon           | 0.153 | 275     | ca.20   | 62   | ca. 0.02   | <i>Angew. Chem. Int. Ed.</i> <b>2017</b> , 56, 12566.                        |
| Ni <sub>3</sub> S <sub>2</sub> nanosheet array      | Ni foam                 | 1.60  | 260     | ca. 20  | /    | ca. 0.003  | <i>J. Am. Chem. Soc.</i> <b>2015</b> , 137, 14023.                           |
| Co <sub>3</sub> Se <sub>4</sub> Nanowire            | Co foam                 | 2.60  | /       | 161.7   | 44   | 0.026      | <i>Adv. Energy Mater.</i> <b>2017</b> , 7, 1602579.                          |
| Ni <sub>3</sub> FeN nanoparticle                    | Glassy carbon           | 0.35  | 280     | ca. 20  | 46   | ca. 0.009  | <i>Adv. Energy Mater.</i> <b>2016</b> , 6, 1502585.                          |
| Three-Dimensional nanoporous iron nitride Film      | Ni foam                 | /     | 238     | ca. 100 | 44.5 | /          | <i>ACS Catal.</i> <b>2017</b> , 7, 2052.                                     |

<sup>a</sup> The overpotential at the current density of 10 mA cm<sup>-2</sup>.

<sup>b</sup> The current density at the overpotential of 300 mV.

<sup>c</sup> The TOF value at the overpotential of 300 mV based on the mass of the loaded catalysts.

<sup>d</sup> The TOF was calculated based on the surface active site, not the mass of the loaded catalysts.

**Table S2.** Comparison of the MOR performance of hollow CoP OCHs with those of other MOR catalysts reported in the literature.

| Catalysts                             | Substrate               | Loading (mg cm <sup>-2</sup> ) | Electrolyte              | Scan rate (mV s <sup>-1</sup> ) | Onset potential (V vs. SCE) | Potential@ 50 mA cm <sup>-2</sup> (V vs. SCE) | References                                                   |
|---------------------------------------|-------------------------|--------------------------------|--------------------------|---------------------------------|-----------------------------|-----------------------------------------------|--------------------------------------------------------------|
| Hollow CoP OCHs                       | Carbon paper            | 0.50                           | 1.0 M KOH+1.0 M methanol | 5                               | 0.23                        | 0.35                                          | This work                                                    |
| Porous CoP NSs                        | Carbon paper            | 0.50                           | 1.0 M KOH+1.0 M methanol | 5                               | 0.26                        | 0.43                                          | This work                                                    |
| NiSe nanowire                         | Ni foam                 |                                | 1.0 M KOH+1.0 M methanol | 10                              | ca. 0.30                    | ca. 0.40                                      | <i>RSC Adv.</i> <b>2015</b> , <i>5</i> , 87051.              |
| CoP array                             | Carbon cloth            | 1.47                           | 1.0 M KOH+1.0 M methanol | 10                              | ca. 0.23                    | ca. 0.40                                      | <i>Nanotechnology</i> <b>2016</b> , <i>27</i> , 44LT02.      |
| Ni-Co-O oxides                        |                         |                                | 1.0 M KOH+1.0 M methanol | 50                              | ca. 0.30                    | ca. 0.60                                      | <i>Mater. Lett.</i> <b>2017</b> , <i>196</i> , 365.          |
| Co <sub>3</sub> O <sub>4</sub> @CoP   | Ni foil                 | 1.0                            | 1.0 M KOH+1.0 M methanol | 10                              | ca. 0.25                    | > 0.50                                        | <i>Adv. Energy Mater.</i> <b>2017</b> , <i>7</i> , 1602643.  |
| Co(OH) <sub>2</sub> nanoflakes        | Ni foam                 | 0.50                           | 1.0 M KOH+0.5 M methanol | 10                              | 0.27                        | ca. 0.40                                      | <i>New J. Chem.</i> <b>2017</b> , <i>41</i> , 9546.          |
| Co <sub>2</sub> P@Co/N-C nanoparticle | Rotating disk electrode | 0.20                           | 1.0 M KOH+0.5 M methanol | 10                              | 0.30                        | >> 0.50                                       | <i>Small</i> <b>2017</b> , <i>13</i> , 1700796.              |
| Cu(OH) <sub>2</sub> @CCHH nanowire    | Copper foam             | 15                             | 1.0 M KOH+0.5 M methanol | 10                              | ca. 0.20                    | ca. 0.33                                      | <i>Small</i> <b>2017</b> , <i>13</i> , 1602755.              |
| Ni-NiO@C nanoparticle                 | Glassy carbon           | 0.36                           | 1.0 M KOH+0.5 M methanol | 50                              | ca. 0.30                    | ca. 0.60                                      | <i>J. Phys. Chem. Solids</i> <b>2018</b> , <i>112</i> , 119. |

Note: The MOR performance is highly dependent on the test conditions, including electrolyte (concentration of KOH or/ and methanol) and CV scan rate, for the same catalyst. Therefore, only some representative transition metal based catalysts tested under similar conditions are listed here.

## References

- [S1] H. Liu, F. X. Ma, C. Y. Xu, L. Yang, Y. Du, P. P. Wang, S. Yang and L. Zhen, *ACS Appl. Mater. Interfaces*, 2017, **9**, 11634.
- [S2] C. C. L. McCrory, S. Jung, I. M. Ferrer, S. M. Chatman, J. C. Peters and T. F. Jaramillo, *J. Am. Chem. Soc.*, 2015, **137**, 4347.
- [S3] J. Y. Xu, J. J. Li, D. H. Xiong, B. S. Zhang, Y. F. Liu, K. H. Wu, I. Amorim, W. Li and L. F. Liu, *Chem. Sci.*, 2018, **9**, 3470.
- [S4] D. Meki, S. Fierro, H. Vrubel and X. L. Hu, *Chem. Sci.*, 2011, **2**, 1262.
- [S5] J. Y. Xu, T. F. Liu, J. J. Li, B. Li, Y. F. Liu, B. S. Zhang, D. H. Xiong, I. Amorim, W. Li and L. F. Liu, *Energy Environ. Sci.*, 2018, 10.1039/C7EE03603E.
- [S6] Y. P. Zhu, Y. P. Liu, T. Z. Ren and Z. Y. Yuan, *Adv. Funct. Mater.*, 2015, **25**, 7337.
- [S7] J. F. Chang, Y. Xiao, M. L. Xiao, J. J. Ge, C. P. Liu and W. Xing, *ACS Catal.*, 2015, **5**, 6874.
- [S8] W. Li, X. F. Gao, D. H. Xiong, F. Xia, J. Liu, W. G. Song, J. Y. Xu, S. M. Thalluri, M. F. Cerqueira, X. L. Fu and L. F. Liu, *Chem. Sci.*, 2017, **8**, 2952.
- [S9] D. Li, H. Baydoun, C. N. Vernai and S. L. Brock, *J. Am. Chem. Soc.*, 2016, **138**, 4006.
- [S10] H. F. Liang, A. N. Gandi, D. H. Anjum, X. B. Wang, U. Schwingenschlögl and H. N. Alshareef, *Nano Lett.*, 2016, **16**, 7718.
- [S11] N. Jiang, B. You, M. L. Sheng and Y. J. Sun, *Angew. Chem. Int. Ed.*, 2015, **54**, 6251.
